# Supplementary material
Source: publisher figshare collection journal article supplement (https://tandf.figshare.com/articles/dataset/_/9746573)
Supplement: Supplementary file 1 [file 1]

Archive with 2 entries (2 files):
- gmos_a_1659507_sm7153.csv
- gmos_a_1659507_sm7152.pdf
