# Supplementary material
Source: publisher figshare collection journal article supplement (https://tandf.figshare.com/articles/dataset/_/9746573)
Supplement: Supplementary file 1 [file 1 › gmos_a_1659507_sm7152.pdf]

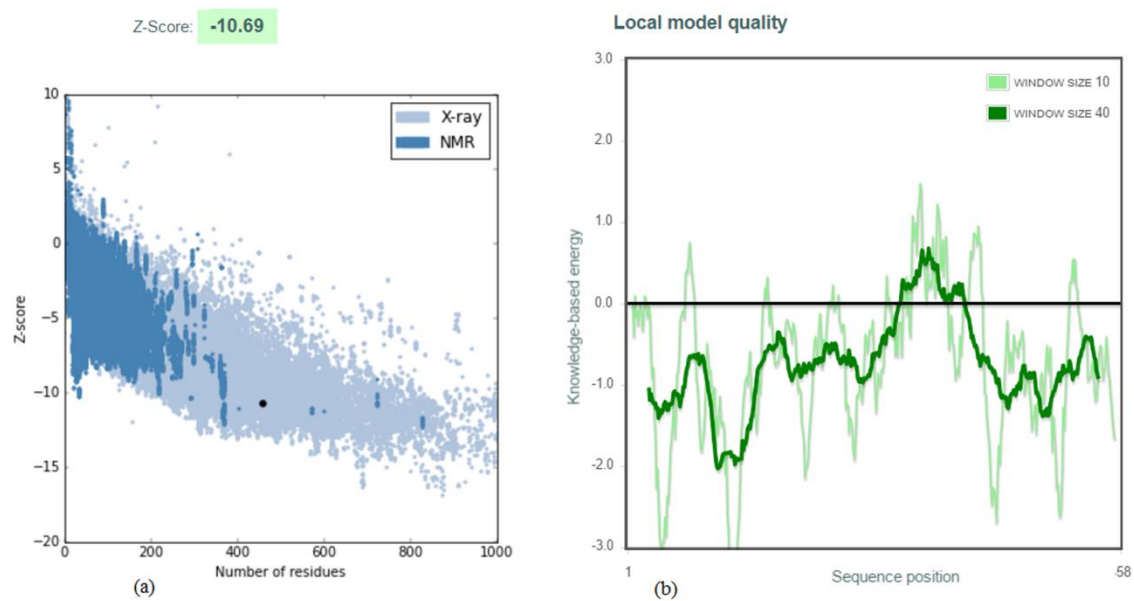

**Figure S3** The overall (a) and local quality (b) of homology model of mutant DprE1 model in terms of Z-score obtained from ProSA tool.

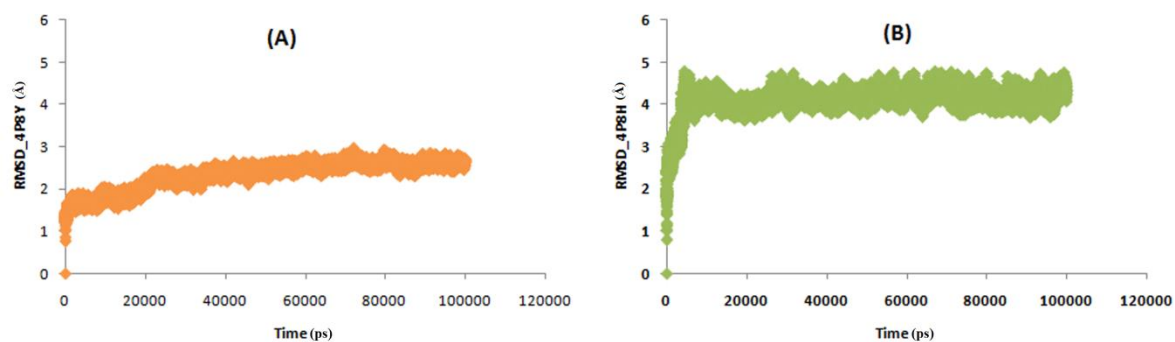

**Figure S4** RMSD profile of backbone atoms of two different wild type DprE1, with intermediate (PDB ID = 4P8Y) (a) and poor resolutions (PDB ID = 4P8H) (b).

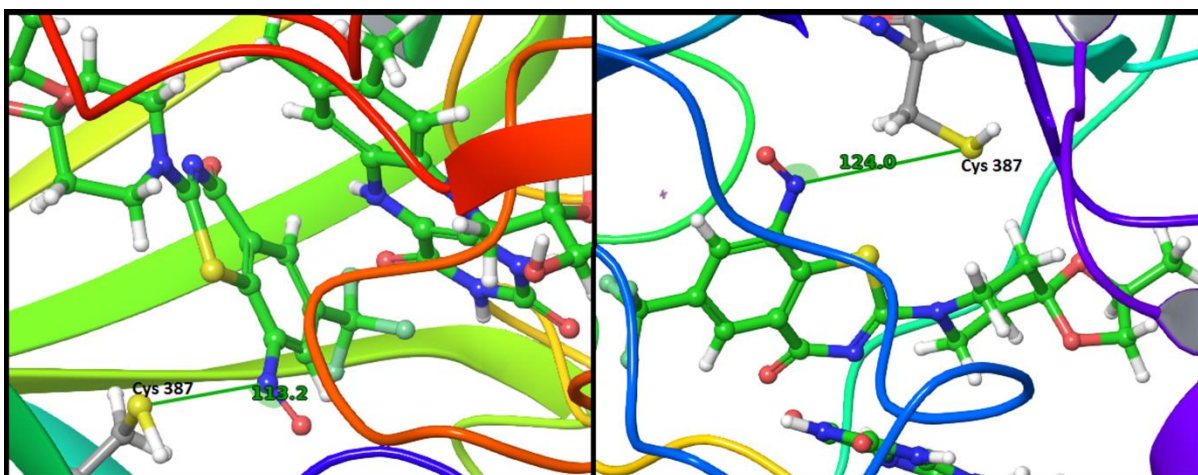

**Figure S5** Calculated Burgi-Dunitz angle of wild type DprE1 with intermediate resolution (PDB ID = 4P8Y) (a) and poor resolution (PDB ID = 4P8H) (b).

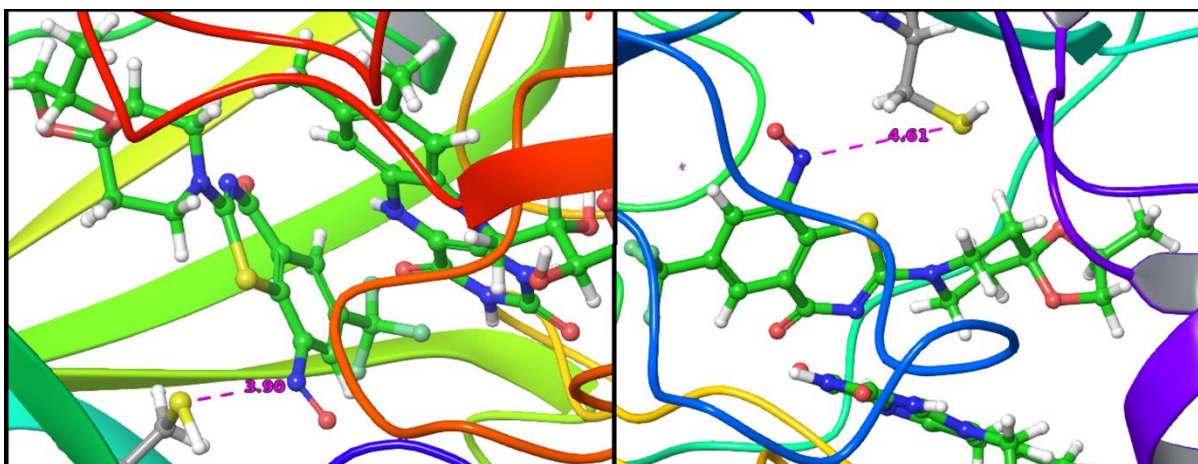

**Figure S6** Calculated distances favorable for a nucleophilic attack in case of wild type DprE1 with intermediate (PDB ID = 4P8Y) (a) and poor (PDB ID = 4P8H) resolution (b) using molecular dynamics simulations.

**Table S2** DFT based Molecular orbital energies calculations

| Ligands  | HOMO (eV) | LUMO (eV) | $\text{HOMO}_{\text{nucleophile}} - \text{LUMO}_{\text{electrophile}}$<br>$(\Delta E)$                                                                                     | $\text{HOMO}_{\text{Electrophile}} - \text{LUMO}_{\text{nucleophile}}$<br>$(\Delta E)$                                                                                     |
|----------|-----------|-----------|----------------------------------------------------------------------------------------------------------------------------------------------------------------------------|----------------------------------------------------------------------------------------------------------------------------------------------------------------------------|
| Cysteine | -0.238    | 0.016     | $\text{HOMO}_{\text{Cysteine}} - \text{LUMO}_{\text{BTZ043}}$<br>$= -0.243\text{eV}$<br>$\text{HOMO}_{\text{Serine}} - \text{LUMO}_{\text{BTZ043}}$<br>$= -0.251\text{eV}$ | $\text{HOMO}_{\text{BTZ043}} - \text{LUMO}_{\text{Cysteine}}$<br>$= -0.256\text{eV}$<br>$\text{HOMO}_{\text{BTZ043}} - \text{LUMO}_{\text{Serine}}$<br>$= -0.261\text{eV}$ |

|               |        |       |   |   |
|---------------|--------|-------|---|---|
| <b>Serine</b> | -0.246 | 0.021 | - | - |
| <b>BTZ043</b> | -0.240 | 0.005 | - | - |
