# Supplementary material
Source: publisher figshare collection journal article supplement (https://tandf.figshare.com/articles/dataset/_/9746573)
Supplement: Supplementary file 1 [file 1 › gmos_a_1659507_sm7153.csv]

	Wild		Mutant
TimeStep (ps)	Distance_wild DprE1 (Angstrom)	Burgi Dunitz Angle_wild DprE1 (Degrees)	Distance_mutant DprE1 (Angstrom)	Burgi Dunitz Angle_mutant DprE1 (Degrees)
0	3.74725037	67.24103962	3.791330777	86.88118652
4.8	3.550874213	87.05493639	3.26444463	111.69862
9.6	3.917274616	79.87797236	4.00699697	65.14093758
14.4	3.682816917	88.66746815	3.528773929	83.31501406
19.2	3.893453484	68.10128817	3.711754174	63.42564443
24	4.174736649	40.48247472	3.736105385	88.81476304
28.8	3.473012817	79.83620302	3.370380771	84.41745229
33.6	3.505462372	76.29875378	3.863019553	74.82159346
38.4	3.841838989	72.97825971	4.350821786	56.89626586
43.2	3.964137164	78.29876525	3.574791475	85.786723
48	3.437921863	77.24005951	3.181671515	83.11196859
52.8	3.782980839	62.55907058	3.861954073	86.0102138
57.6	3.88408662	83.27730543	3.684003895	68.22006566
62.4	3.684286492	91.4869849	3.157770955	77.54251142
67.2	4.243829859	71.04395185	3.439977891	92.17967241
72	4.178387846	41.60422381	3.259908237	82.50510796
76.8	4.019040284	66.19751131	3.465296907	82.69971664
81.6	4.53699622	86.17210934	4.232535748	89.31769933
86.4	4.201830194	76.47108835	3.309587682	71.43604808
91.2	3.49232731	77.81842193	3.520782195	76.51230242
96	3.712934357	53.29784394	3.347610773	78.07367569
100.8	3.35188154	78.84456013	4.754174182	84.28310605
105.6	3.90046379	70.12306056	3.136157232	87.91071221
110.4	3.712982084	74.00878242	3.380692005	72.38144089
115.2	3.725904051	58.97437698	3.45257495	71.69293409
120	4.510938235	54.22454415	3.024256807	85.61632536
124.8	3.545457453	78.28497188	3.547409736	99.58497313
129.6	3.300013962	87.48784183	3.259154561	81.29176594
134.4	3.241093564	80.68758576	3.275120979	99.20589767
139.2	3.580293666	83.32787057	3.466296645	62.21149201
144	3.593860828	53.71897841	3.408873133	92.42011675
148.8	3.190316981	76.69983173	3.02403626	69.89002834
153.6	4.014925062	57.91527809	3.265554371	81.63711278
158.4	4.023838351	94.55118506	2.936678292	99.04407517
163.2	3.625525189	79.3167235	3.386277368	100.4855422
168	3.651922796	69.25297195	3.034756215	86.31094477
172.8	3.273012851	76.73833367	3.564438684	86.65669054
177.6	3.706119162	78.52611393	3.198909476	69.71635157
182.4	3.418859023	82.2115832	2.988002272	82.75293786
187.2	4.056674233	69.2872572	3.367328751	77.35665204
192	3.65260032	96.93339409	3.480261856	75.50212873
196.8	3.54221817	64.37864154	3.402101839	86.11940073
201.6	3.630402463	72.53860823	3.929289392	59.49768174
206.4	3.309272967	56.15960265	3.243213574	92.20932832
211.2	3.466332842	63.83595357	3.318107274	81.63027204
216	4.243505954	40.57846245	2.994119923	96.54373655
220.8	3.79186494	63.49584737	3.500482489	94.7632493
225.6	3.579915574	59.72989895	3.401276247	68.79200714
230.4	3.601800965	68.15770538	3.325394365	67.10743219
235.2	3.619191406	56.95426837	3.334731988	88.24771432
240	3.733733916	71.17274838	3.64843871	66.77627541
244.8	3.740592602	91.27130298	3.326163862	93.83403504
249.6	3.796768768	69.89286277	3.865651083	91.40769042
254.4	3.374677138	69.29283819	3.378371908	74.39594506
259.2	3.456781432	82.53076459	3.480109495	97.73499314
264	3.30495614	65.60133681	3.320290445	106.3068136
268.8	3.206227588	85.73942767	3.265448201	74.69860955
273.6	3.618345493	62.31972056	3.237036606	98.58240199
278.4	3.529797867	70.89191221	3.433367022	63.86822199
283.2	3.334488749	89.81277846	3.348147664	78.15586605
288	3.692831101	70.98953744	3.160133007	67.61390419
292.8	3.486417645	68.91094297	3.154938173	71.44056704
297.6	3.521885657	57.79000545	3.210023785	105.2832418
302.4	3.500426783	69.92028467	2.942649396	74.11369251
307.2	3.621589369	87.36883348	3.396967582	91.4176272
312	3.344057918	87.31519589	3.333348655	89.41830929
316.8	3.554044711	79.8161497	3.344760324	89.6454017
321.6	3.588795329	74.93267511	3.258159199	77.53016125
326.4	3.673363976	95.9153573	3.626849166	87.65795761
331.2	3.961980572	72.08466585	3.000311051	88.91683008
336	3.763700506	91.18096816	3.005840292	96.88336469
340.8	3.80064797	74.93934227	3.504103621	63.75953292
345.6	3.341553486	105.6019467	3.897812285	62.63557965
350.4	3.395557914	88.45489814	3.916554703	128.7497272
355.2	3.632336249	89.73954307	3.429129614	95.03973732
360	3.558463932	83.03686917	3.120200334	111.5680448
364.8	3.534205177	102.7803382	3.10884594	106.2191438
369.6	4.14636377	124.4137748	3.649779297	117.3429035
374.4	3.31979095	72.26764508	3.175659954	103.6324584
379.2	3.422186906	93.85072659	3.128032563	111.7998652
384	3.37268753	91.74755446	2.847601686	99.02797902
388.8	3.537899729	88.92163548	3.521666471	105.0363237
393.6	3.129689766	100.0605612	2.796332472	106.6329093
398.4	3.446729982	86.04874627	2.956595144	97.71258246
403.2	3.531766935	116.1286313	3.406403642	90.86457515
408	3.82477151	92.8170238	3.073955836	105.5216151
412.8	3.372587337	121.4210108	3.095149429	109.6486564
417.6	3.364322843	100.2507577	3.106399044	83.09865319
422.4	3.49678785	98.12249855	4.107907307	108.5086423
427.2	3.654041158	95.83974443	3.874130017	116.666837
432	4.071478202	72.33448284	3.710582446	122.8501457
436.8	3.478654476	100.3260718	3.000067376	96.23932461
441.6	3.76429747	68.64707392	3.190621119	106.6221626
446.4	3.95433499	90.5377169	2.973071082	116.098307
451.2	3.610350706	99.3272326	3.032879805	83.00690328
456	3.514762865	84.95238493	3.138249781	88.09097989
460.8	3.142495083	83.22748319	3.651850993	76.81810248
465.6	3.981199066	86.19095969	3.231736296	101.7773591
470.4	3.566831505	73.67507565	3.035371709	102.1677019
475.2	3.644981849	62.69008309	2.966286506	90.25463002
480	3.846062649	104.329648	3.026735059	93.90968353
484.8	4.011862996	90.93404696	3.156717701	84.45535443
489.6	3.538285933	111.4188273	3.168611751	86.08509989
494.4	3.341019554	79.40556095	3.247469212	108.5638546
499.2	3.921694421	114.7686781	3.062888197	79.05086478
504	3.96793123	72.68447077	3.265108325	80.1335012
508.8	3.383439447	76.45449258	3.367691514	143.1161508
513.6	3.714589987	94.40631667	3.198800483	104.5179488
518.4	4.132617829	94.95729783	3.57674	102.4538479
523.2	3.738439327	90.33057275	3.294745505	113.4154947
528	3.724855514	72.15981971	2.899724909	98.91482379
532.8	3.247288231	91.41911518	4.061740422	105.6898468
537.6	3.463912801	80.59668408	3.680916151	112.6640687
542.4	4.344621937	66.03513976	3.836372155	112.9696265
547.2	3.511582036	93.10883601	3.324075378	110.3571902
552	3.289848415	114.2232971	3.396860503	124.9551796
556.8	3.506268843	91.77510667	3.888478143	120.8589571
561.6	3.552929111	62.30827726	3.438432966	118.7246965
566.4	3.407071807	72.41665507	3.543032696	93.68528838
571.2	3.33341887	100.711422	3.601704931	110.8910858
576	3.388197504	100.8573991	2.980820479	116.1436681
580.8	3.787612753	96.01157076	3.529987601	123.4812626
585.6	3.650371592	93.47726152	3.973021988	98.42315921
590.4	3.716689418	76.63392296	3.088396418	111.6237249
595.2	3.508368573	110.4078201	3.471924453	95.28360436
600	3.699740294	102.3838526	3.398470862	94.95031344
604.8	3.281705485	70.39946744	3.28662811	140.52471
609.6	3.817176744	91.66400775	3.780926456	99.65069523
614.4	3.515456661	114.8538443	3.14649813	149.9312297
619.2	4.051298167	101.8481344	3.705166036	121.7776897
624	3.584435753	85.98929422	3.924477613	122.4005457
628.8	3.161564651	95.13153268	4.15739255	133.4776925
633.6	3.469123182	82.07511938	3.832723656	136.8968795
638.4	3.385165455	98.14286957	3.235552643	128.8783641
643.2	3.678166172	84.8203631	3.476174435	106.9488218
648	3.945932962	62.59693703	4.024822754	124.3100776
652.8	3.927979522	85.26976065	3.735602474	122.8065849
657.6	3.382609748	104.6600139	3.265330286	104.3235344
662.4	3.471773669	73.6781193	3.967174951	138.111623
667.2	3.755903422	105.5006261	3.364976436	105.5924501
672	3.472415085	98.38002736	3.492498349	131.9601521
676.8	3.570275252	121.0077364	4.375049266	126.6924356
681.6	3.367151607	98.74233297	4.215936932	128.3178474
686.4	3.920019072	81.71035355	4.704944026	111.9508866
691.2	3.61075433	89.03838275	3.805895531	135.8404793
696	3.936996349	99.5397259	4.174940428	102.7396854
700.8	3.487841415	85.0753485	3.657294639	123.1757825
705.6	3.729154965	110.3798037	3.647070283	152.9648074
710.4	3.544414565	95.38699082	3.885777272	120.6387884
715.2	3.177941467	120.4929857	3.901410968	124.9359756
720	3.747528212	69.40561747	3.463141779	128.4067418
724.8	3.430402194	86.82277237	4.470878042	129.3871674
729.6	3.668900036	104.1142375	4.391298465	110.7366003
734.4	3.36232714	102.5992526	3.438288516	115.8595357
739.2	3.309908779	102.3817562	4.834489839	116.7413418
744	3.585457846	93.12710146	3.992056383	123.7506937
748.8	3.31917581	109.8015945	4.956981704	96.23416081
753.6	3.453644621	78.93675234	4.117777453	122.5750227
758.4	3.160773639	87.53197225	4.782424049	115.4888212
763.2	3.248106482	96.75862774	3.615792596	135.4146015
768	3.796949876	106.5264876	3.441117406	98.84537462
772.8	3.480262281	87.86006503	3.363530337	88.24085249
777.6	3.32241415	100.1500848	2.929107275	104.3348102
782.4	3.870598233	99.69339486	3.6630058	85.27292298
787.2	3.888812884	98.58517798	3.4260562	79.15843587
792	3.343410774	109.9510575	3.543376753	97.2342491
796.8	3.270307599	88.2409874	3.20131309	113.8035393
801.6	3.50589784	95.88684481	3.177504781	100.1575783
806.4	3.48158717	116.9901205	3.196824607	116.6826203
811.2	3.304419084	113.8019465	3.155508565	110.4367837
816	3.348241025	96.09426052	3.577473831	94.71846499
820.8	3.5841973	73.59843573	2.879903285	88.33720449
825.6	3.114542078	101.2615255	3.135938583	90.37630631
830.4	3.66270917	112.3641657	3.006826365	83.69630408
835.2	3.533564229	66.74216088	3.237590481	89.45431734
840	3.659826684	80.98115545	3.114789155	89.67731301
844.8	3.311326555	95.04460968	3.00259119	85.7071277
849.6	3.179255172	86.56080883	4.596796458	115.9856765
854.4	3.366278181	93.37980502	4.00474651	149.1521158
859.2	3.466921022	92.93326978	4.749848148	136.8670679
864	3.778850845	104.8745064	3.824244744	142.1287903
868.8	3.527954546	57.26597047	3.699480208	127.2183696
873.6	3.930497543	94.80415932	3.759379112	117.5505368
878.4	3.223862802	101.7190824	3.681365963	121.4533487
883.2	3.406669075	88.67575798	4.251246265	145.4270759
888	3.235832079	87.44457335	3.998337131	132.6016026
892.8	3.582940578	110.2781708	4.338735123	116.4025403
897.6	3.277072411	75.41766086	3.301914426	129.4182427
902.4	3.543542564	79.39041842	3.165611173	100.9029176
907.2	3.169730092	97.04273848	4.023168668	68.21591884
912	3.283118127	86.6137795	2.658393652	112.0122585
916.8	3.552311734	71.47291821	2.972130853	89.5625578
921.6	3.381582936	97.26833486	3.299225051	81.50487949
926.4	3.732772907	85.02633041	2.929583453	84.58502405
931.2	3.219555378	102.7720357	3.192078577	76.53619433
936	3.605094012	88.26525094	3.005877872	73.30475688
940.8	3.838215964	97.83223897	2.879026052	92.49854714
945.6	3.611221315	86.40271124	3.265618495	69.29491624
950.4	3.238086486	74.28410939	3.253853078	71.85623016
955.2	3.190185383	102.0125344	3.207415896	90.45346944
960	3.298570895	95.11085576	3.129211565	87.04587246
964.8	3.977706076	55.5095029	3.153873752	90.88128998
969.6	3.964523824	90.50009952	2.975417834	89.4360969
974.4	3.859998295	79.66686768	3.196531681	90.73834348
979.2	3.421805901	92.3862763	2.963680284	71.91471736
984	3.648014199	96.18361921	2.864161465	112.7501002
988.8	3.530068344	90.01545324	2.752797722	101.044345
993.6	3.618613882	95.71972612	2.863795693	100.6950989
998.4	3.553005939	70.01509679	3.078020396	106.675595
1003.2	3.595354276	82.22115844	2.933432786	83.7686124
1008	3.533628012	92.90736422	3.413038873	126.3441468
1012.8	3.816379581	80.21213019	3.290084843	119.5310505
1017.6	3.768990782	97.31183521	3.247710752	119.4556171
1022.4	3.29708615	108.1721721	3.073230947	107.4885594
1027.2	3.333417085	93.60989908	3.502776802	65.41005194
1032	3.445483145	106.012458	3.109214284	98.105479
1036.8	3.429828827	103.4876676	2.881741285	104.2795801
1041.6	3.532031089	102.797298	3.724040957	103.8292007
1046.4	3.554825212	91.3448742	3.488567665	103.3552554
1051.2	3.367566724	103.5515559	3.630125383	114.8805372
1056	3.488755993	111.0528265	3.100600744	112.1138998
1060.8	3.53259395	102.1146162	3.227357079	112.6731875
1065.6	3.346051989	130.5899778	3.471987159	118.5239573
1070.4	4.082510983	75.96510611	4.205372146	133.2559209
1075.2	3.806412725	103.4060647	3.88935559	95.01276669
1080	3.755218887	89.21882428	3.059160248	102.9465993
1084.8	3.686228186	98.95442104	2.992741986	107.1050571
1089.6	3.112883565	85.71549681	3.464155599	128.2120477
1094.4	3.584510253	68.34466962	3.653329902	108.2232758
1099.2	3.88236815	110.8955556	4.573813274	125.8827031
1104	3.817406257	80.90335771	5.154371035	126.3632397
1108.8	3.570304568	70.66420731	5.361355614	104.9091814
1113.6	3.241190753	73.86682285	5.476513471	115.2044152
1118.4	3.461029306	83.04621019	5.56857064	112.8507618
1123.2	3.325564529	107.9700585	6.514243371	93.39372088
1128	3.589836552	86.18143218	5.674216112	117.484023
1132.8	3.455947831	91.22663063	4.905899645	106.3321818
1137.6	3.728832888	97.61002683	6.223174834	105.4639649
1142.4	3.505874934	77.50690947	5.469565116	108.7862446
1147.2	3.358167206	82.52593836	6.529747739	124.4760316
1152	3.547402639	76.99847976	6.54618209	106.8184567
1156.8	3.584121641	73.70589409	6.173941665	131.5246002
1161.6	3.45969149	82.26500566	5.31617357	118.7373445
1166.4	3.258804898	109.1185805	6.17711716	125.0196079
1171.2	3.405015687	93.09447846	5.884872432	142.0728481
1176	3.448884668	101.7205893	6.427924964	113.853163
1180.8	4.23905012	76.47265343	5.738412921	128.4794883
1185.6	3.365950156	77.53461728	5.11576744	118.8328736
1190.4	3.360454052	78.46760213	6.800372776	151.6946396
1195.2	3.548040045	76.16329434	5.411081401	139.1773219
1200	3.751774829	100.8275578	5.447308167	143.7542867
1204.8	3.256300715	72.55458566	5.442373177	112.7689746
1209.6	3.707278142	66.95290685	5.083534698	134.3499171
1214.4	4.153506317	73.06729745	5.45939353	137.3523202
1219.2	3.329349326	80.18774215	6.392036258	119.2858017
1224	3.605981312	107.37905	5.586450334	110.2702546
1228.8	3.484118622	83.96378018	6.16353221	114.5171087
1233.6	3.692265819	92.025185	5.983274802	120.4533732
1238.4	3.709254829	98.53527372	5.468715761	119.2717985
1243.2	4.180665004	64.20892713	5.247851378	115.8469053
1248	3.81384438	97.76494863	5.87792961	130.6935499
1252.8	3.837614799	65.75850746	5.682138537	102.6630265
1257.6	4.279093838	80.43422249	5.352795767	109.5690553
1262.4	4.084730436	55.17616295	5.189619982	152.8063658
1267.2	4.2482247	45.2427975	5.856644628	121.9588798
1272	4.440450803	50.72730796	4.888788241	116.9390997
1276.8	3.925860784	40.2390897	5.985497633	126.4511902
1281.6	3.754796062	69.12679397	4.525392237	135.2762996
1286.4	3.564519014	79.86781696	5.271903588	116.4139122
1291.2	3.383971159	83.81871473	4.711351844	119.0133497
1296	3.208725581	99.45105837	6.235235035	114.2126445
1300.8	3.344027191	87.12488386	5.492936578	126.0020374
1305.6	3.367982097	86.6238891	5.799645041	108.7681562
1310.4	3.768756719	59.61749922	5.433173124	101.8311119
1315.2	3.79527903	62.7509848	5.834709883	122.8090609
1320	3.782744354	50.68604145	4.718314539	122.2931724
1324.8	3.885233771	79.30249008	5.666507208	116.8836179
1329.6	3.262712186	85.85387254	5.432383428	118.9796264
1334.4	3.768466837	66.02918119	5.439497029	134.1936141
1339.2	4.100063347	65.85459981	4.809141759	120.1621688
1344	3.281033211	65.15532968	5.506063248	106.859831
1348.8	3.477803242	69.7322787	6.105895525	131.8545309
1353.6	3.499521921	73.26914439	5.326368607	114.4290392
1358.4	4.103795518	63.06012468	6.522402007	127.922537
1363.2	3.687469595	69.02518359	6.850219914	119.4982595
1368	3.229865509	88.1048821	6.237639056	120.2421218
1372.8	3.3295287	84.30632575	5.892801228	134.6747402
1377.6	3.648538404	73.67514981	5.254049684	129.0859647
1382.4	4.749069916	69.74357467	6.037617518	124.627629
1387.2	3.402502351	103.5817711	6.920262784	97.45200822
1392	3.08351102	113.0555949	6.764366488	96.21614484
1396.8	3.284564659	87.97723033	5.452930502	113.1381838
1401.6	3.139867112	103.0631913	6.770897651	117.9324293
1406.4	3.344134903	88.02014583	6.450095144	112.702096
1411.2	4.053295181	80.94260223	5.539881682	138.3892987
1416	3.474399956	60.69133555	6.871228996	102.9210559
1420.8	3.367459535	98.78387859	5.44809198	123.5364561
1425.6	3.682326519	90.09876317	6.487303339	123.1218777
1430.4	3.578697412	78.1929098	6.879266922	113.9788486
1435.2	3.39462047	106.5502461	6.847950076	140.6024835
1440	3.692168184	77.39887952	6.707167281	119.170065
1444.8	3.320814329	90.09355495	7.29769884	120.2801245
1449.6	3.506006502	72.07443522	6.00112379	109.4776444
1454.4	3.838691368	61.5282709	6.038701901	105.484772
1459.2	3.497075033	89.29335983	5.801920191	112.9563801
1464	4.022708792	69.54875542	5.98870723	113.6778383
1468.8	3.508311137	86.160097	6.058812366	123.5687826
1473.6	3.402056491	88.16293053	6.449548268	127.813886
1478.4	3.888950577	98.57032012	6.083352676	115.7488505
1483.2	3.146640198	91.4737032	6.348242428	122.3550504
1488	3.827799814	60.58502671	6.397296007	142.5211222
1492.8	3.501955668	73.92453558	5.214872009	116.9826633
1497.6	3.897433149	81.21217273	6.02872894	134.5500731
1502.4	3.551466421	83.73269036	6.212400075	144.0311696
1507.2	4.187275335	59.83318062	6.775974612	115.8369091
1512	3.952606599	66.27775332	6.69229128	144.9978183
1516.8	3.995666099	68.52837444	6.41289473	106.1881932
1521.6	3.854240218	60.39142972	6.76789528	123.3849691
1526.4	3.690544763	83.59118033	6.305049475	119.2565016
1531.2	4.1532739	71.83361227	7.13146251	117.7347471
1536	3.313345392	75.64335374	6.82863307	132.7570852
1540.8	3.656290825	65.24254995	6.734464187	110.6516319
1545.6	4.013426313	62.75289715	6.379996645	137.318757
1550.4	3.52061927	70.14124782	6.930573962	121.5301138
1555.2	3.6424858	75.83773688	6.269085614	123.8933425
1560	4.029214844	56.07217409	6.172663989	118.922851
1564.8	3.454946316	113.3823604	6.616255128	125.9784008
1569.6	3.827414367	89.2645882	6.773593818	119.207923
1574.4	3.633284763	67.89290694	6.810179446	117.6818897
1579.2	3.412914871	87.70597749	6.007523219	130.2195225
1584	4.088721912	71.52077535	5.941695803	130.2706015
1588.8	3.693854397	77.54361939	7.405363144	110.9911562
1593.6	3.52825091	88.85063742	6.448097636	116.9334567
1598.4	3.509207	81.60257629	5.286251091	161.2286401
1603.2	3.436442516	66.24182236	5.965096742	119.3820967
1608	3.20779045	106.3268807	6.217723268	109.2617501
1612.8	3.070577814	85.94683804	5.003178921	122.9504886
1617.6	3.406604468	79.80590093	5.859282516	113.5772739
1622.4	3.474888169	79.81914803	5.70026866	105.6034898
1627.2	3.668981664	73.52395855	6.437558267	114.9860965
1632	3.665761409	94.12500124	5.823643023	136.7382785
1636.8	3.478842752	106.8353886	5.993954602	143.3528854
1641.6	3.274468582	97.45089986	6.401448766	104.9442092
1646.4	3.861457418	80.71267265	5.544525386	110.9639274
1651.2	3.50192772	102.747482	5.986371472	117.6079115
1656	3.856167287	100.5637104	6.292464657	136.4296845
1660.8	3.256853299	88.72399483	5.754201317	125.3704938
1665.6	3.551654187	82.17301692	5.985217411	122.4393968
1670.4	3.186979604	108.1046325	6.303978081	139.5787507
1675.2	3.97420318	66.26345876	4.880052384	125.8156907
1680	3.458167313	99.17140261	6.505858283	124.2077495
1684.8	3.73416283	80.42298872	6.09752477	118.8571832
1689.6	3.640242632	77.22306263	6.525105409	123.8792688
1694.4	3.371882167	84.82021264	6.904588313	93.69277337
1699.2	3.347127922	109.152943	6.235534659	124.4332446
1704	3.500603967	80.03947544	6.477914671	113.9561379
1708.8	3.275147745	78.92638055	6.267490042	112.1967862
1713.6	3.21090247	78.76401885	5.737627129	113.954873
1718.4	3.546566001	112.3443189	5.984706225	105.6933325
1723.2	3.702404433	84.72985745	6.288003818	135.2589681
1728	3.492680297	78.96299864	5.349053508	122.1399351
1732.8	3.64327718	112.7421766	5.110893476	151.9539312
1737.6	3.551387955	69.02155586	5.509927196	119.8569028
1742.4	3.417137077	85.1446863	5.021594016	110.622949
1747.2	3.571611974	77.42628538	5.723731916	135.4869335
1752	4.093446521	79.01651417	5.8168946	132.6010831
1756.8	3.758323025	84.00069086	6.588490931	112.2774892
1761.6	3.473483733	77.32564222	6.552923696	125.6612273
1766.4	3.404403941	83.53499706	6.335194512	125.074097
1771.2	3.889067543	69.92070423	5.92038573	131.2180747
1776	3.377439266	98.38379779	6.074762628	105.3967065
1780.8	3.6554057	56.29320738	5.356168993	132.515176
1785.6	3.486965416	81.36598783	5.309721928	122.4092637
1790.4	3.773735775	88.72255367	5.862755246	120.9557516
1795.2	3.81512775	94.80302857	5.599191345	124.1945373
1800	3.84933523	69.74884931	5.59988491	145.9978911
1804.8	4.07239705	60.71060596	4.88608154	135.2219279
1809.6	4.037174156	72.68968301	5.494351261	133.3456318
1814.4	3.94744317	60.21075372	5.174377016	131.1953286
1819.2	4.048069992	46.39693666	6.284494736	135.1327272
1824	3.894174063	69.26388197	6.48273035	112.5831386
1828.8	3.994539948	81.9648278	5.916247412	137.8666633
1833.6	4.067588403	65.53997311	6.647455583	140.0833511
1838.4	3.760120489	93.50817265	5.989749818	112.755272
1843.2	4.082260019	59.77032661	4.800787911	148.366605
1848	4.049269824	50.45186449	5.407674192	114.2024166
1852.8	3.593861607	76.64389689	5.597818286	123.4990933
1857.6	3.650333606	57.88354658	6.684411618	139.0345974
1862.4	3.600207676	51.91735309	5.419554954	117.8035797
1867.2	3.693593344	70.53842275	6.37209261	120.5133288
1872	3.158169634	82.5538625	6.049710853	128.6310309
1876.8	3.763287079	80.36117561	5.995781912	114.3203458
1881.6	3.386203757	98.31189803	5.535077401	129.9526501
1886.4	3.46773194	84.54765416	5.813019961	131.9600167
1891.2	3.676223478	81.14846127	5.318668766	141.2535159
1896	3.407747512	79.04198843	5.944247047	128.3924048
1900.8	3.304554828	81.65175476	6.862195181	118.3558353
1905.6	3.740494031	79.85420273	6.464260612	136.0985998
1910.4	3.313674861	89.81637606	5.86426204	123.2977588
1915.2	3.542871693	74.02577566	6.19604257	124.9590041
1920	4.332956597	48.39765691	5.751453657	130.6471569
1924.8	3.708529658	80.603548	5.57098759	102.679582
1929.6	4.131082969	50.8651803	7.229756418	128.5888496
1934.4	4.223017156	41.51444409	6.489092743	114.4024824
1939.2	3.72461891	75.84929448	6.359651637	130.8536593
1944	3.765036052	67.99775978	6.425829007	117.0670525
1948.8	3.974234851	75.03797423	6.206697225	112.701604
1953.6	3.459117814	74.53723807	6.282776767	109.8240963
1958.4	3.905737227	62.03742571	6.860302347	122.0190778
1963.2	3.705998342	77.03304026	6.646905272	108.1337554
1968	3.518612501	87.21957568	6.980379559	125.6646807
1972.8	4.97654353	61.94340347	6.670433899	114.356938
1977.6	3.740188259	79.04919003	5.980745635	126.4380913
1982.4	3.423696074	76.23563297	7.029982299	136.3591268
1987.2	3.840895238	57.49942667	5.859562313	121.9779731
1992	4.274028177	59.68724679	6.314295491	127.9151364
1996.8	3.250772885	87.09892205	5.402779008	128.093806
2001.6	3.293521758	88.14380904	5.23431179	133.4506741
2006.4	3.661348988	79.55309881	5.787938121	137.6649711
2011.2	3.292103635	90.41488985	5.820727245	137.8031158
2016	3.686333094	64.04981524	5.569456099	121.2624835
2020.8	3.89996868	58.30326387	5.332160412	114.6630219
2025.6	3.687444923	63.27685437	5.258525182	128.4968061
2030.4	3.997901803	85.33294492	5.549988997	106.9644138
2035.2	3.973546522	44.70772483	4.730956213	122.5522162
2040	3.58452008	70.82067981	5.492560433	118.2445941
2044.8	3.71543343	61.10189696	5.894209885	119.105274
2049.6	3.805494519	58.48749645	6.23287243	125.7622425
2054.4	3.764996456	75.14424481	5.607733702	123.8358041
2059.2	3.541479936	60.16106649	6.383901523	125.2414311
2064	3.946260634	66.86424687	5.78745562	128.2009392
2068.8	3.427868644	72.73480554	5.971585859	133.383748
2073.6	3.775491869	63.03584376	5.702767248	123.4403001
2078.4	3.460814021	85.06114261	5.498290857	114.9277493
2083.2	4.260687442	68.37933866	6.323416915	99.6579214
2088	3.592496503	60.67846156	6.547931895	133.5756554
2092.8	3.647520557	52.1220818	6.619772458	123.7455877
2097.6	3.874280679	75.19375964	6.004792498	108.6952439
2102.4	3.703323199	66.786923	5.91154722	115.1087715
2107.2	4.01444276	84.17687904	5.938874051	115.6659408
2112	3.940768771	73.50380834	5.994837436	128.3660625
2116.8	3.36741644	94.66722007	6.030976418	105.7181715
2121.6	3.86175416	78.74246862	5.934617816	126.6272971
2126.4	3.340689442	82.70029603	5.860852921	130.7434994
2131.2	3.894436841	62.86385568	6.132598878	116.8610729
2136	3.746602402	74.50352256	5.813111379	109.284947
2140.8	3.822215432	85.15587447	5.691625973	115.5994099
2145.6	3.870476284	59.660921	5.599230302	121.1666191
2150.4	3.868621225	85.81947035	5.632801672	122.5305493
2155.2	4.074466154	75.74404835	5.103814652	107.7769908
2160	3.356820208	92.95925326	5.748066413	133.4528275
2164.8	3.837187423	101.7650405	6.142598249	114.2876003
2169.6	3.653705393	69.6762226	5.625812558	115.5668981
2174.4	3.367871518	81.53425736	6.149557498	132.4245937
2179.2	4.051150176	73.28150211	5.474813627	128.1320138
2184	3.937749637	80.11603203	6.175005566	146.8931617
2188.8	3.703700936	92.47578523	5.008713448	125.0238833
2193.6	3.705705598	128.2453363	5.102202104	120.1375355
2198.4	4.458716735	55.11574598	5.372092139	124.5118434
2203.2	3.556946399	61.93664178	6.038872229	111.8082903
2208	3.943639141	53.39429088	5.952889718	133.0900846
2212.8	3.771346537	78.28076814	5.792911621	119.5616418
2217.6	3.646385334	112.8623031	5.280917615	133.2317631
2222.4	3.614620735	81.72890944	5.657857534	132.8397815
2227.2	3.752931782	97.90279053	4.980148407	129.4795696
2232	3.967815655	107.6966229	5.469657391	138.537406
2236.8	3.85744444	92.75558179	5.097269154	127.1231166
2241.6	3.909244589	57.39836489	5.468990926	119.0236346
2246.4	4.29721354	65.89157064	5.102647555	135.4620096
2251.2	3.774672094	82.3246462	5.809770744	103.9155531
2256	4.437698351	64.60942646	6.206187032	138.6458517
2260.8	4.06177382	96.02854777	6.23614182	117.9674988
2265.6	4.184122049	105.3911448	6.159025334	135.0595616
2270.4	3.922455145	124.9422357	6.925321993	116.0914584
2275.2	3.393397504	89.81503065	5.569715792	128.5948131
2280	3.808386217	93.98181592	6.263737797	127.6347789
2284.8	3.68836415	76.0718444	5.112181819	133.5235992
2289.6	4.033220055	109.0035332	6.483447954	123.8593955
2294.4	3.955940483	88.75999078	5.491875181	122.0022622
2299.2	3.810644049	99.43704752	5.455817938	133.6381357
2304	3.742097176	93.75994096	4.907482139	129.2971784
2308.8	3.732135099	76.30747324	5.488834838	135.2553145
2313.6	4.213241689	87.53472286	5.394122089	140.5879769
2318.4	4.247581984	90.27266868	4.848881542	142.2678918
2323.2	4.366234267	90.80993626	3.091081692	144.5719598
2328	3.694982956	105.1560615	5.452479053	137.3225949
2332.8	4.45255915	78.89481772	4.138489762	137.0969283
2337.6	3.446158997	94.93245085	4.403053105	141.1539722
2342.4	4.273618626	76.91977851	5.230435299	142.5741004
2347.2	4.278830993	73.59355775	5.66930422	143.9851654
2352	3.461156387	116.5062684	6.065978607	142.4939329
2356.8	3.824579527	87.24423526	5.659743746	122.5375622
2361.6	4.332044379	85.7070978	5.389175519	127.3298727
2366.4	3.923775951	77.4157143	5.564263028	120.3276133
2371.2	4.434881795	84.51022227	6.608454395	102.5336548
2376	4.098191752	82.82179883	6.46566421	100.2183568
2380.8	3.807394041	59.46855225	5.83183143	118.3014034
2385.6	4.160641971	88.63738024	6.624006728	135.3433446
2390.4	4.04635409	111.7496044	6.432455796	119.1986821
2395.2	3.591719139	115.2797139	6.245431172	92.20062109
2400	3.813363315	92.99101368	5.85305833	109.4702139
2404.8	3.74833801	99.24088699	5.631283047	124.7468911
2409.6	3.927006388	59.29216083	6.198899315	115.6588359
2414.4	4.204337211	67.73080469	6.155417074	110.5894136
2419.2	3.575950482	85.37153011	6.039529065	119.6003372
2424	3.716539978	64.37916397	6.441022926	126.5243979
2428.8	3.953886121	105.8195125	6.934476961	123.8444724
2433.6	3.386435236	102.2606593	6.95327848	114.1901337
2438.4	4.242861365	66.37963081	6.296795699	108.5343986
2443.2	3.981652527	102.6665241	6.588866825	113.0005205
2448	3.634329035	83.8353591	6.666094355	130.7132033
2452.8	3.474059152	68.67061725	5.781291443	132.9242956
2457.6	3.438513555	82.38536898	5.142207403	128.0045959
2462.4	3.309299927	79.56960032	6.454703335	123.7843331
2467.2	3.728785707	73.03790996	6.005317887	115.551238
2472	3.736337007	91.5559271	5.291300743	120.2397583
2476.8	3.507726342	91.36382496	5.482085935	129.018842
2481.6	3.983937284	57.20141795	5.960273217	119.4398884
2486.4	3.951563058	56.34905666	5.044240503	108.7918967
2491.2	3.444895132	97.25337872	5.822143724	108.9386028
2496	3.605298169	52.27609236	6.715823756	117.7701871
2500.8	3.90621651	59.02368415	6.089206886	103.2699744
2505.6	3.207730577	77.5166985	6.379101863	131.0467427
2510.4	3.443753114	74.86294234	6.078141884	101.8344156
2515.2	3.603619111	93.11503392	5.703577174	125.3688285
2520	3.613677016	93.0722572	7.060969225	108.7297608
2524.8	3.523188608	77.41964798	5.328764149	137.5171319
2529.6	3.866205444	91.26702659	6.538321821	132.6337213
2534.4	3.845640722	94.44147798	6.014497379	122.1044954
2539.2	3.442079116	77.67104825	5.278291439	133.3318486
2544	3.689838431	105.2880506	5.397212862	123.5918633
2548.8	3.430169806	73.34181189	6.061259286	117.4760844
2553.6	3.632907488	70.24745177	6.076925054	120.1636985
2558.4	3.820689104	101.6150258	5.114553491	131.3154312
2563.2	3.805443044	82.34569249	5.589137932	131.7012608
2568	3.712986637	109.6908889	5.001266945	137.2345513
2572.8	3.73332214	82.79273032	5.382534652	141.8175856
2577.6	3.645953015	81.48722664	5.151102416	136.4452131
2582.4	4.041631407	76.1263876	5.968102541	119.4457697
2587.2	3.456425263	98.71157935	5.129578197	119.7394819
2592	3.607966122	103.9090393	5.162564003	135.6040471
2596.8	3.521568399	101.8871165	6.218992098	116.8512195
2601.6	3.846583855	100.9810611	5.474028519	128.3525209
2606.4	3.70380682	84.498904	5.063947088	117.2599758
2611.2	3.648247624	84.57098506	5.245204193	111.3336673
2616	3.660995097	104.0136008	5.132005094	121.7973547
2620.8	3.561997736	64.94666386	5.552231603	139.9805202
2625.6	3.829617816	72.93203409	6.209404101	112.018021
2630.4	3.681818581	80.31573139	5.726377413	129.6077592
2635.2	3.692500243	70.87263216	5.705681221	111.3509472
2640	3.55776518	60.62664333	4.810883971	124.8002461
2644.8	3.842695303	61.95746153	4.656517065	140.8720059
2649.6	3.306053006	96.19166507	5.672879539	121.6484086
2654.4	4.363475136	71.71030198	5.284971074	130.3678725
2659.2	3.790241366	95.1784377	5.597632808	124.8678227
2664	3.721891002	98.05384062	5.336770367	134.6610056
2668.8	3.518131326	78.33267471	5.887349531	114.787992
2673.6	3.739595683	102.5629469	5.893313318	113.8699409
2678.4	3.685033601	106.3000811	5.734934923	119.9049444
2683.2	3.41484682	101.5489856	5.611385121	115.8168114
2688	4.622157978	85.79774607	5.989479652	128.2360248
2692.8	3.684499803	86.05156923	6.063728433	131.9635038
2697.6	3.702993285	86.59228499	6.778477319	117.2942236
2702.4	3.639380368	95.67878452	7.038041305	133.9996845
2707.2	3.657555392	77.99038005	5.01658447	116.9805665
2712	3.352599071	83.01042175	5.241963302	124.3382713
2716.8	3.930382503	83.26368834	5.852792406	148.3806772
2721.6	3.827726344	83.42700095	4.458751116	132.8139135
2726.4	3.797351678	69.33358998	5.131509887	116.3211687
2731.2	4.510564178	92.17136856	4.823193738	134.9736422
2736	3.924498809	84.98759832	5.413349365	120.3647383
2740.8	3.864288259	86.88201806	4.976439483	119.8230878
2745.6	3.274822273	95.35345799	4.970333529	126.3390261
2750.4	3.818306344	65.41933414	4.429927956	108.1500047
2755.2	4.249574647	91.75021051	5.38864882	130.5505878
2760	3.918609421	75.33201546	5.937802817	107.3048488
2764.8	3.918494131	105.8193864	5.565900168	115.0970042
2769.6	3.576235038	84.2755318	5.937045934	133.2046239
2774.4	3.417961643	74.10038039	6.195791437	128.9457191
2779.2	4.43972767	87.79256791	5.499112008	119.6340607
2784	3.59550067	94.84132772	5.95196994	122.9586694
2788.8	3.966816663	49.79989553	5.911679572	118.3825674
2793.6	3.687201136	103.6864299	6.224827194	109.6386248
2798.4	3.771545357	67.17287706	5.654088867	119.7333211
2803.2	3.917584216	84.68467537	5.062944854	123.6387432
2808	3.832836168	98.43653832	5.314486739	118.2830019
2812.8	3.889604203	95.90591366	5.520721747	114.5076377
2817.6	3.521743196	91.52229437	4.818533738	142.3855195
2822.4	3.912992335	95.9885423	5.804882793	142.5585936
2827.2	3.316753719	115.5732821	5.298306783	133.3206202
2832	3.527274878	118.9832798	4.840978139	136.7291557
2836.8	3.507104294	97.79431779	4.936491624	135.7088565
2841.6	3.731178558	94.12297204	4.870960112	128.78822
2846.4	3.585683097	83.43564578	5.363596228	115.108772
2851.2	3.863215167	103.6174781	5.016295014	117.1955679
2856	3.61791397	93.10436545	5.393423515	126.017388
2860.8	3.506970296	83.38696287	5.54754871	138.2044816
2865.6	3.602030881	94.69883856	5.823400246	120.1328411
2870.4	4.046388946	83.43395654	5.767099253	142.7783754
2875.2	4.141560723	71.39458888	5.181357282	126.5482355
2880	3.299413796	104.7734072	5.173296459	110.1950179
2884.8	3.268404049	73.72312464	5.677267841	131.8772634
2889.6	3.470344097	91.23161774	4.711193793	126.7587558
2894.4	3.436812522	79.50844372	5.776750488	124.7134258
2899.2	3.496473164	101.1193434	5.603843718	113.2627232
2904	4.079689323	94.49128158	6.250254347	140.5355642
2908.8	3.774375242	94.59596579	4.922245141	134.3377876
2913.6	3.76120536	94.97593584	4.88863967	118.2060783
2918.4	3.264556807	110.7207482	5.187246851	133.0390035
2923.2	3.64216218	79.21006341	5.298567424	109.8503891
2928	3.699882203	84.34255958	4.657918991	124.9668397
2932.8	3.493502696	100.4913408	4.868769759	130.4601161
2937.6	3.731613237	61.24572994	5.398602977	119.64781
2942.4	3.171105562	89.71332813	4.840318697	131.9884282
2947.2	3.377104602	106.8129808	4.594732128	107.8078234
2952	3.613708474	100.0100489	5.281701192	131.3607492
2956.8	4.030983614	102.8178487	5.25771526	115.117059
2961.6	3.283931072	79.17231731	5.785530655	125.4376988
2966.4	3.166564135	94.85032868	4.541461789	142.3082272
2971.2	3.644174091	103.5863348	5.103051804	129.04479
2976	3.243104041	85.02119587	5.252152202	124.2993573
2980.8	3.776593095	91.13581226	4.978788724	127.132293
2985.6	3.116487399	100.2195986	4.715279146	123.6837715
2990.4	3.207434661	90.72442608	5.193019183	122.9461067
2995.2	3.547098525	107.6325672	5.696584976	141.0181733
3000	3.868762439	92.1892416	4.596632755	126.2773336
3004.8	3.3718945	100.1759891	5.682522591	107.8601093
3009.6	3.247077967	108.263614	5.054958512	125.7092207
3014.4	3.409512124	110.2609961	4.875993139	139.9347066
3019.2	3.54627569	69.01511305	4.851741289	130.2903942
3024	3.222375288	102.9908006	5.821715872	124.3437562
3028.8	3.439388803	100.8551375	5.374855347	137.1889611
3033.6	3.596645677	97.95869343	5.127117879	124.3216402
3038.4	3.453753017	88.64479793	4.645004525	128.9724283
3043.2	4.005972632	99.59761135	5.354204586	132.8086465
3048	3.464530221	112.8319486	4.78114901	144.6543333
3052.8	3.83260402	70.19394731	4.96117419	109.3842334
3057.6	3.400578052	90.1902001	5.005076178	132.3873515
3062.4	3.250977706	74.06356603	4.410062711	141.4967303
3067.2	3.571202143	78.27763614	4.742418833	131.427166
3072	3.465257755	103.968138	5.580709234	133.3897852
3076.8	3.453660605	94.1911408	5.024125162	142.0816951
3081.6	3.308895816	80.94268614	5.34931085	146.1554259
3086.4	3.180851054	92.7033975	5.088195535	137.3945926
3091.2	3.599063069	97.22196916	5.607333023	152.016665
3096	3.624646735	96.93523667	7.12721513	118.2740781
3100.8	3.818105226	91.70195115	4.71696419	115.0063595
3105.6	3.848545878	76.38273015	5.460255899	116.3010597
3110.4	3.99622788	86.51826117	5.510160761	120.4225369
3115.2	3.383700137	68.09949818	5.279550624	131.8969144
3120	4.102871398	38.66534182	5.033652929	131.3878686
3124.8	3.850776508	49.04760353	5.233269787	119.5089199
3129.6	3.691392992	89.9528779	5.763217912	113.8942094
3134.4	4.188433002	94.24242232	5.629111541	120.1082856
3139.2	3.570026331	101.3680125	5.076726456	124.5795817
3144	3.588270785	99.91868059	5.688756847	119.5538391
3148.8	3.62411275	101.0501991	5.09978896	118.5555772
3153.6	3.920900071	55.95810226	6.239234614	140.9809459
3158.4	3.757008964	94.26720356	5.106962706	125.4449137
3163.2	3.450130476	65.09003692	4.013129379	123.748703
3168	3.60479988	93.5450221	4.937263356	136.0344305
3172.8	3.355208852	90.99347419	4.705142147	134.298428
3177.6	3.43861114	80.98141222	5.126552058	126.0292304
3182.4	3.69466919	65.95199159	5.850974361	126.1143893
3187.2	3.234069184	90.20461	5.928598808	120.0987998
3192	3.441128945	106.7927726	5.45195886	113.290617
3196.8	3.233343006	91.55705592	5.300922836	132.7200194
3201.6	3.801045636	68.77178416	4.892876499	127.4893852
3206.4	3.91970833	80.19687131	5.107774669	135.7995702
3211.2	3.824137644	95.21070159	4.899614347	139.4471749
3216	3.396248532	71.08637139	5.454544516	121.3587382
3220.8	3.757155136	64.68613026	5.822522732	125.1995353
3225.6	3.505941694	82.11724795	5.81741212	126.292603
3230.4	3.812748292	86.48551814	5.186496793	137.9802181
3235.2	3.489687203	88.0393518	4.642758454	140.8104427
3240	3.316963678	113.7742804	4.85492662	135.8409045
3244.8	3.563475934	75.56095176	5.831172049	139.3959628
3249.6	3.555967338	88.75652012	5.971656307	100.9842555
3254.4	3.30259199	100.8139974	4.557972471	138.2846327
3259.2	3.458759206	76.98805189	6.006927302	108.0685922
3264	3.198387249	76.03097299	4.805907301	122.3213706
3268.8	3.688247497	86.52491422	5.650849295	129.211817
3273.6	4.011413906	85.48171672	5.408023564	125.7093542
3278.4	3.879818407	69.86557602	5.429966845	129.434379
3283.2	3.498805931	90.76601903	6.043498595	115.1919885
3288	3.96314639	98.88614825	5.301966869	132.3947234
3292.8	3.222476018	94.34966957	4.387433005	135.3248337
3297.6	3.576500402	79.06367425	5.945821038	136.9363627
3302.4	3.408344114	109.0820472	5.792347479	132.9912994
3307.2	3.554117454	82.62950148	5.08481776	133.5134531
3312	3.645622949	81.06880767	5.512077849	126.4460571
3316.8	3.61232132	103.3004092	5.256980475	150.4580423
3321.6	3.301698801	111.6449246	4.844485365	134.136104
3326.4	3.433990315	89.43540237	5.083723921	137.8157089
3331.2	3.49944096	100.4150664	5.547478507	125.1280253
3336	3.461433045	94.47526951	5.436717446	135.8336704
3340.8	4.140500168	98.23099544	4.870455434	146.5193041
3345.6	4.106703108	111.6125164	5.281023227	129.2040571
3350.4	3.443953459	80.52097672	5.315235871	115.1575833
3355.2	3.682279614	92.22381121	5.085339368	128.7506878
3360	3.843710092	119.7721336	5.149216956	136.0593785
3364.8	3.642728784	97.77158073	4.77730206	130.3456827
3369.6	3.357080879	98.24227029	5.177628612	109.6404773
3374.4	3.871237217	98.54001508	4.552448988	117.092414
3379.2	4.140698146	95.15059736	4.888166111	134.024978
3384	4.187298368	115.9746881	4.81671746	129.4017665
3388.8	3.13756498	103.5449034	4.04873072	132.4333479
3393.6	3.521597544	92.54780749	4.404218787	132.6287995
3398.4	3.764683892	111.6372927	5.602489171	132.9162371
3403.2	3.140263559	109.683524	4.947992165	127.0479455
3408	3.67266078	91.30748317	5.743263777	129.8998989
3412.8	3.443031707	88.60659704	4.582001582	112.5425548
3417.6	3.560736155	106.1406197	5.417013711	127.697985
3422.4	3.394138153	72.94481752	4.822598797	110.6111467
3427.2	3.420891364	98.22170456	5.051583556	125.1383422
3432	3.449875514	72.2434797	5.031566617	135.8871368
3436.8	3.435056899	94.14147479	5.100804612	130.6231614
3441.6	3.455591867	111.6400448	4.693670565	147.063734
3446.4	3.414488065	77.61689869	5.091517903	139.1412355
3451.2	3.556919461	85.34330006	5.008867794	118.9872632
3456	3.292168993	74.47081922	4.937416146	118.2435556
3460.8	4.095666669	99.66820545	4.743585291	125.7742229
3465.6	3.430249662	86.4570064	5.25025875	124.9723719
3470.4	3.501050907	119.3711917	4.209643427	137.7379923
3475.2	3.614210787	102.6696883	5.198600729	113.7261578
3480	4.043468989	99.98748025	4.960156394	129.7603144
3484.8	3.273202838	94.38634661	4.600866132	136.6056405
3489.6	3.913597986	111.083289	4.620401001	127.7789812
3494.4	3.928596701	96.67426873	4.780790829	125.6929996
3499.2	3.769610596	86.77686534	4.588452951	147.8458976
3504	3.978277376	87.58029794	4.718835043	107.7594566
3508.8	3.61315989	98.99733742	4.805776635	119.7346733
3513.6	3.625419057	107.6180111	3.797535096	132.6666935
3518.4	3.779742918	107.2293562	4.796925044	126.6262422
3523.2	3.243228455	108.5434376	4.467688959	112.4880037
3528	3.289963545	84.82389628	4.72857612	136.737677
3532.8	3.18014017	86.33257644	4.514642278	138.5006269
3537.6	3.462841376	100.2760225	4.954913444	116.7850333
3542.4	3.51046442	82.24912426	4.835169546	129.1677971
3547.2	3.527830355	143.1281085	4.420599014	138.8776497
3552	3.715292965	89.46751377	5.165207324	146.9114443
3556.8	3.798693398	63.44094614	4.934031533	121.1640826
3561.6	3.767950078	84.94384928	3.872594319	146.357295
3566.4	3.273194248	70.98086903	4.940018322	134.2512211
3571.2	3.491889181	84.27340759	5.282983901	129.199114
3576	3.442650056	82.18156516	4.70040268	103.038981
3580.8	3.594407335	101.4874833	5.216776271	122.7973346
3585.6	3.630916598	80.55063581	4.821311758	137.3120106
3590.4	3.711091574	76.32856232	5.218354424	134.0235978
3595.2	3.553647757	101.6078971	4.899187979	112.6279795
3600	3.60103278	116.4199689	4.063177756	125.0059286
3604.8	3.317621453	93.98921216	4.225897899	117.1307374
3609.6	3.565279416	68.14470616	5.604810416	124.7650805
3614.4	3.507753656	91.25662532	4.785879789	129.5306152
3619.2	3.601948773	69.32205897	5.131484048	113.3501522
3624	3.613471243	97.03644608	4.344156058	131.8281847
3628.8	3.526802272	87.70647737	4.878935885	124.5578394
3633.6	3.408436467	83.78264569	4.870913438	122.6017088
3638.4	3.785147368	105.6560561	5.182007497	132.2469822
3643.2	3.327636448	111.0925165	5.67355536	129.4748283
3648	3.418443834	130.0212208	5.475996841	129.2937513
3652.8	4.259990165	97.0067872	5.243845747	115.475761
3657.6	3.716031888	70.3884586	4.757620267	124.2957277
3662.4	3.865894271	74.5649897	4.478864852	130.4768212
3667.2	3.899882836	101.1294474	5.152725955	112.7019585
3672	3.363341717	95.92579385	4.526257011	115.1845051
3676.8	4.127050391	105.8877967	5.203157344	129.783995
3681.6	4.254743618	95.36292141	4.810943063	123.189009
3686.4	3.580092199	100.1804586	5.030897485	126.9599003
3691.2	3.547217977	113.1910106	5.476835305	129.4361778
3696	3.4234627	82.20788512	5.413134885	153.9069953
3700.8	3.725145388	92.66670524	5.524774665	133.7350362
3705.6	3.720857889	70.52897424	5.363736653	130.2398991
3710.4	3.828052296	92.5178717	4.99406652	133.04795
3715.2	3.53137199	102.9110605	4.274179898	135.8102824
3720	3.942267862	122.5843025	4.542684952	102.6774749
3724.8	3.946374003	99.33882719	6.004301983	125.7308017
3729.6	3.537930209	94.93913897	4.362343243	129.0980772
3734.4	3.830921921	117.1080612	4.701474079	130.5138117
3739.2	3.588008922	106.3938986	4.885556527	116.404646
3744	3.555458018	107.2876279	4.749861193	130.2834869
3748.8	3.869183758	94.12198283	5.441745243	136.9357846
3753.6	4.113452272	94.83629757	4.672485605	115.4690642
3758.4	3.523886905	76.37644632	4.742841228	148.4252007
3763.2	3.365965918	99.35630574	4.645818824	122.36531
3768	3.266635873	78.19425335	5.728976245	128.0514673
3772.8	3.370123572	96.02233545	5.201672622	136.1217584
3777.6	3.337838493	93.59451599	4.795069773	127.8032395
3782.4	3.51089241	71.29663821	4.974465254	123.9294737
3787.2	3.618562157	74.6253753	5.133433752	133.2537068
3792	3.629371884	79.20453895	4.776348425	127.4641959
3796.8	3.696742556	107.7464344	4.231332816	118.8869313
3801.6	3.402031852	83.69367977	5.314500758	111.3751149
3806.4	3.816735258	87.41120937	4.871456501	129.5599888
3811.2	3.500827337	98.22994736	4.78560348	128.9546582
3816	3.68733694	79.28250843	4.77073774	138.5680617
3820.8	4.678952911	90.34197777	4.495152683	146.1527844
3825.6	4.199208088	77.71282819	4.676299362	135.7304689
3830.4	3.57292243	70.34469072	5.042760446	141.9796935
3835.2	3.414807308	111.1665578	4.486236347	147.2232784
3840	3.845620649	68.38819568	4.813205539	145.5779145
3844.8	3.333692467	108.0038955	4.887834831	127.7107
3849.6	3.616372718	96.65314189	4.909989656	137.12953
3854.4	3.334587278	96.41005233	4.456858513	125.3005553
3859.2	3.424343871	99.64694724	4.904255762	124.0293723
3864	3.237105809	113.2151035	4.801930425	132.9183014
3868.8	3.397037855	81.41206449	3.609349663	122.3154517
3873.6	4.652956771	93.0749615	4.578047698	120.7105006
3878.4	3.456643439	107.1023133	4.961138432	123.2539394
3883.2	3.302691132	94.85003328	4.973732014	136.4748584
3888	3.675006142	96.36588226	4.196047355	141.2107319
3892.8	3.645924791	88.64698609	4.165056859	132.6411073
3897.6	3.235404692	86.52899627	3.806606718	120.3477114
3902.4	4.401835584	70.7396751	4.965744461	120.8662688
3907.2	3.688989539	98.94836861	4.898159542	139.1034571
3912	3.331717993	80.65862836	4.470953121	111.3445596
3916.8	3.573471914	93.89424582	5.667317157	136.0311781
3921.6	4.057493881	107.3840859	4.523887096	118.1446633
3926.4	3.210690799	82.2537301	4.633763467	118.5492992
3931.2	3.557968537	101.4899272	4.881132285	129.9427162
3936	3.595274797	61.22313808	5.469774477	125.3676164
3940.8	3.262682864	97.69432265	3.942386091	151.9027667
3945.6	3.619780962	110.5168506	4.393144662	120.4780504
3950.4	3.56775464	78.69139062	4.834937186	123.3331246
3955.2	3.148502468	105.0002181	4.584758099	146.3941854
3960	3.52580821	83.63388301	4.738112947	129.6388991
3964.8	3.381322114	100.5889224	4.021185778	138.5468335
3969.6	3.751288865	98.83737488	4.36206867	123.0854305
3974.4	3.516785041	85.94431855	3.735907192	113.4469367
3979.2	3.495887784	91.03910413	2.896180081	105.1907132
3984	3.395230737	99.23920082	3.271355795	121.7468226
3988.8	3.504398676	107.7493787	3.57954894	95.97855574
3993.6	3.602702044	106.8283857	3.26576102	88.41980103
3998.4	3.5645048	111.4977632	4.167972469	128.3058457
4003.2	2.99353655	89.51075767	3.91012288	123.6645163
4008	3.38266279	103.9151104	4.116583477	143.6909677
4012.8	3.831709429	88.85858558	4.791211531	118.6434383
4017.6	3.671112037	88.95550273	3.980758171	102.0429906
4022.4	3.747877784	112.3953118	4.149544646	135.2065056
4027.2	3.762874846	116.5442795	3.846782585	144.4209764
4032	4.005328858	92.24885654	4.162823369	141.6075367
4036.8	3.274567963	119.3395335	5.023487441	139.8207322
4041.6	3.572970877	94.05274688	4.940984937	119.5282349
4046.4	3.449185573	114.4487338	4.678571127	130.9663393
4051.2	3.452066726	107.7420553	4.391472875	115.0022301
4056	3.127617828	81.56354411	3.922954039	116.5525614
4060.8	3.033142388	102.7675482	4.594997544	138.7155721
4065.6	3.842057638	80.45203969	5.149088365	129.682193
4070.4	3.272291063	109.6821148	4.098382217	130.9661921
4075.2	3.65462681	97.07509329	5.353979228	122.8042231
4080	4.711853462	62.81840113	4.076359447	115.3176153
4084.8	3.55018343	82.58212401	4.65036491	149.5741623
4089.6	4.395867123	79.77187842	4.774299753	134.7423543
4094.4	3.669599574	60.38311006	4.111719148	143.603862
4099.2	4.114263397	42.54484173	4.783329363	136.317995
4104	3.536844011	68.71736901	4.43846141	144.424777
4108.8	3.839249278	59.94359859	4.96996222	139.1358368
4113.6	3.9562829	73.20126302	5.20101593	127.9891019
4118.4	4.043044019	73.46419303	4.522017202	125.7584949
4123.2	3.6980826	87.99305276	4.779539461	108.1422842
4128	3.706657458	82.76090396	4.675132519	116.7613675
4132.8	3.814437151	65.80045555	4.384928591	140.0335298
4137.6	4.238563647	56.1506003	5.312792993	127.0595419
4142.4	3.528963879	72.6803761	4.644452273	115.516285
4147.2	4.099873911	61.338048	4.515960937	121.3163803
4152	3.32845312	109.4162142	4.841989836	133.8049966
4156.8	3.851593937	133.2481053	4.303152826	121.8074897
4161.6	3.84794807	76.59703382	4.703546721	123.0575872
4166.4	3.547370906	98.44574403	4.692988803	130.9625078
4171.2	3.902173959	105.7555727	5.277850254	133.1315365
4176	3.291448253	89.88904208	4.755244645	125.739509
4180.8	4.229905179	70.59459836	4.554426343	121.7166855
4185.6	3.330007554	99.73463344	5.122872507	121.7746952
4190.4	3.767039743	103.5024699	4.567311375	108.403141
4195.2	3.89845805	84.59319854	4.857227249	128.4176586
4200	3.708931183	104.4290862	5.488176603	123.9990259
4204.8	3.671081122	101.3117225	5.116385784	118.4838443
4209.6	4.40520353	86.26334262	3.244703402	104.5049727
4214.4	3.684144104	92.28992356	3.139028342	120.1964629
4219.2	3.575239432	103.4813524	5.527266492	104.4573603
4224	4.153757505	90.1032682	3.906307343	131.5091996
4228.8	4.576894664	78.37182489	5.523882396	131.9595216
4233.6	3.49790843	94.86201107	4.979762296	120.9327041
4238.4	3.892230431	57.27219458	3.919638151	144.1508369
4243.2	4.332904929	66.23874965	4.669648445	141.9363315
4248	3.602252169	108.6391141	5.083538071	124.8388041
4252.8	3.587666438	115.6767598	4.033379701	127.7418468
4257.6	3.73257515	76.94049578	4.704781144	116.9670806
4262.4	3.658807276	94.73737702	4.40389893	129.9856151
4267.2	3.199714133	103.1773191	5.109330835	112.4753605
4272	3.704249711	96.60181873	4.079764755	123.209348
4276.8	4.046418965	79.13907481	5.609979875	127.0257393
4281.6	3.893486175	96.27973182	4.593962343	122.1874026
4286.4	3.90378581	91.17271291	4.492872497	119.2294465
4291.2	3.868721166	79.47968729	4.182341322	133.6633234
4296	3.479750815	92.35819421	4.141041722	144.1557263
4300.8	4.235465002	88.39419334	4.687156749	129.3685035
4305.6	3.404729746	84.04121952	4.791392332	131.0888466
4310.4	3.118838516	110.3613722	5.24542939	149.7585049
4315.2	3.909713758	94.89513191	4.422204478	127.4751055
4320	3.650339749	95.41363298	4.355834664	128.2409185
4324.8	3.584922454	105.7176558	4.850099586	115.475506
4329.6	3.949657517	71.69822548	4.346363712	139.7876
4334.4	4.114591835	64.96262109	4.451203557	129.2651754
4339.2	3.886326919	110.5949362	5.566345532	124.0445568
4344	3.841840143	84.25992176	4.658844019	118.839099
4348.8	3.579380635	99.08213211	5.03579254	124.6937565
4353.6	3.668010285	93.29011455	4.6823402	117.0739054
4358.4	3.865371567	89.11568139	4.835548334	121.5101683
4363.2	4.039817402	97.51640256	4.91185302	110.6374085
4368	3.676907605	75.3737313	4.021645997	128.4467565
4372.8	3.773615902	86.83377592	4.197219478	119.9287552
4377.6	3.65664227	93.49160981	4.75271562	133.1026367
4382.4	4.10584291	99.90795164	4.786776581	130.2870372
4387.2	3.314808544	98.66565478	4.674017245	120.0133988
4392	3.611044169	83.84923415	4.951035587	134.7523441
4396.8	3.608894203	81.19503535	4.785631483	113.7705204
4401.6	3.823797012	111.8595176	3.804722352	108.68391
4406.4	3.557045399	111.1055786	4.774835023	116.5294821
4411.2	3.564188291	104.2477027	5.165418282	127.4074003
4416	3.298354439	90.3299394	4.815694335	116.2044358
4420.8	3.655260663	92.603376	4.338853122	125.5626474
4425.6	3.612535553	94.81350919	4.761041635	127.0128021
4430.4	3.253217841	96.91296831	5.338933944	125.7701911
4435.2	3.427781301	105.3670098	4.178670409	132.9272697
4440	3.632971341	111.5910953	4.843250856	125.1383253
4444.8	3.397410038	105.8603291	3.265412771	84.94767075
4449.6	3.922743451	95.73480405	3.17831723	93.43903045
4454.4	3.144584255	113.8883518	3.377749205	130.2903553
4459.2	3.936811064	86.0892042	3.081239037	133.9163381
4464	3.258859577	72.50700942	3.643833656	85.34632161
4468.8	3.541409609	81.49816779	3.705942086	113.8793667
4473.6	4.061855712	74.58457443	3.235935588	117.1765532
4478.4	3.408494427	98.45768953	3.801406835	120.5873729
4483.2	3.726647243	105.4592972	3.360123874	74.33962956
4488	3.546355491	107.9099726	4.122411542	124.1731749
4492.8	3.768865603	88.21169247	4.968696554	146.9301591
4497.6	4.704032113	82.99148494	3.33096797	90.03049843
4502.4	3.367398374	88.53040361	3.517179046	110.8540527
4507.2	3.375744556	91.36631694	3.786319902	150.0823923
4512	3.885083777	104.5175687	3.447441458	134.6165059
4516.8	3.697723648	80.27192099	3.268764717	140.3404352
4521.6	3.554768229	115.9706115	4.846124652	142.5493585
4526.4	3.593524734	112.2604819	3.003538709	110.4371502
4531.2	3.594351031	103.8879797	3.224172645	100.8607196
4536	3.255762635	115.3830318	3.022880137	134.8257195
4540.8	3.704791497	79.38888678	3.194201922	90.17314334
4545.6	3.223971372	108.332151	3.645586172	128.564412
4550.4	4.194855542	95.0900005	3.037573413	138.4946145
4555.2	3.659116851	104.6709718	3.749727901	121.6268483
4560	3.477008994	102.8957204	5.042734581	104.4629988
4564.8	3.680931162	100.6790414	4.971500895	151.8760116
4569.6	3.750424607	84.94785971	4.521779189	147.6680355
4574.4	3.98721352	100.4265108	3.565093649	111.9815396
4579.2	3.656365912	120.2730434	3.458093724	109.5610407
4584	3.721645574	110.7788391	3.168044141	104.1643371
4588.8	3.856677923	90.52384196	3.6090867	67.43796343
4593.6	4.458257867	93.8805746	3.923250059	117.1755633
4598.4	3.709595667	108.209354	3.713583552	104.8827414
4603.2	3.205388533	88.24899038	3.294974826	101.8789846
4608	3.803682085	100.1311705	3.383409524	110.7626824
4612.8	3.449544774	111.2471625	3.031670888	115.7397204
4617.6	3.90724623	88.47358132	3.494364391	118.2870135
4622.4	3.961565257	93.22496969	3.456824868	120.0642017
4627.2	3.499627516	114.7198283	3.766369177	81.012419
4632	3.628517397	110.1730856	4.831328517	104.6046713
4636.8	3.564782416	97.46405201	4.153459121	115.8589556
4641.6	3.388893425	96.68264213	3.727107924	119.7782621
4646.4	3.387263232	122.7514042	5.409017089	115.5221781
4651.2	3.148709426	93.00114756	3.797251047	76.87410648
4656	3.620891656	90.90073954	3.754943543	73.23691446
4660.8	3.593619026	90.15115207	5.569074603	107.9718588
4665.6	4.352958105	86.51871817	3.82848495	106.547679
4670.4	3.805436312	118.7354932	4.276981598	113.0808124
4675.2	3.718190605	76.543366	3.147986708	100.6657365
4680	3.682488272	87.58613735	3.503475257	125.7976831
4684.8	3.884918009	83.50962572	3.184427386	128.1028947
4689.6	3.76510385	104.6773241	3.455933271	96.12375681
4694.4	3.261291988	106.6976058	4.251282141	139.7144103
4699.2	4.135174683	104.3403402	3.381214226	107.1908528
4704	3.614526578	91.79808384	4.062491601	143.460198
4708.8	4.27788829	94.31810766	3.903548262	109.2841476
4713.6	3.584954346	93.80094379	4.095095349	109.6548259
4718.4	4.29204855	104.1863728	3.816715375	110.3399375
4723.2	3.668471164	125.4991908	3.753662015	102.7104067
4728	4.085971072	83.79224747	4.95263946	126.4356006
4732.8	3.510544549	128.6118711	3.862715069	125.5059237
4737.6	3.509759108	86.0036534	3.857236443	118.6943461
4742.4	3.97506067	103.2517445	3.242015454	110.9287383
4747.2	3.749854576	123.1619489	3.188479689	117.4088397
4752	3.910445197	106.1264745	3.924146871	150.6766176
4756.8	3.447508577	74.7768436	4.535397749	101.7613378
4761.6	4.082809329	95.25682821	3.717974082	102.6916939
4766.4	3.503363666	89.71068531	3.817240695	89.25398209
4771.2	4.284742406	82.85278509	3.019812887	86.11971814
4776	3.582719411	77.18068095	4.081964976	103.9823186
4780.8	4.096058627	112.1179043	4.470744962	142.9655044
4785.6	3.328311482	116.4949701	3.305015248	98.66677385
4790.4	3.65051686	84.72359515	3.927420648	110.9227326
4795.2	4.069998712	116.4526458	3.645173331	110.769331
4800	4.056299977	120.3211378	4.40422019	86.60185469
4804.8	4.110044463	103.4818834	3.880080119	75.2011496
4809.6	4.043925041	84.33378363	3.6847464	67.18931216
4814.4	4.458929478	105.498105	4.090894946	81.70427264
4819.2	3.769279847	98.81788508	3.780957865	97.08850632
4824	3.748719861	112.7817417	4.0962195	112.0651913
4828.8	3.780850621	97.89294146	3.445754147	63.95620462
4833.6	3.928945153	106.4437417	3.865521889	66.18423255
4838.4	3.866481646	116.8584524	3.960491635	96.23335095
4843.2	3.936642462	99.4833394	3.357249887	91.49617241
4848	3.616541475	112.2565554	3.708143976	100.4153845
4852.8	3.83688776	108.5577758	3.885024931	76.48214928
4857.6	3.81548293	97.27777692	3.750487739	66.7489182
4862.4	3.901842207	106.9670311	4.230413536	71.08893687
4867.2	3.642710118	119.0537049	4.176271856	85.70990085
4872	3.344521986	101.5150521	4.553504716	82.11723171
4876.8	3.727038167	92.7689334	3.535822876	87.11383211
4881.6	3.550435813	125.7502375	3.990700421	64.24336999
4886.4	3.777514931	90.89197399	3.669298703	71.02651048
4891.2	4.222199205	110.1506005	3.890315661	70.47473355
4896	3.832049245	105.5187742	3.880486836	62.44245258
4900.8	4.343997833	103.6864765	3.786118169	81.36054718
4905.6	3.887533078	103.6831419	3.381836903	82.394531
4910.4	3.973470203	98.6949449	3.981382654	64.79976776
4915.2	4.358062305	89.20552121	3.923870411	77.06746805
4920	4.094987168	109.9132067	3.781100211	82.18891905
4924.8	3.207770483	124.145551	3.321115027	71.25960301
4929.6	4.004218028	79.32013821	3.832633312	60.04617362
4934.4	4.40762109	77.99403736	3.695949664	75.17967268
4939.2	4.318055249	64.53124395	3.540856557	86.51770473
4944	4.398416305	77.37490034	3.739349928	71.38261034
4948.8	3.899355258	69.93586267	3.182141826	65.70392712
4953.6	4.531051407	59.17063944	3.28130078	76.08554133
4958.4	3.358068868	84.03612735	3.389738221	77.29713637
4963.2	4.166284919	74.84442613	3.604553731	81.04811086
4968	4.136822927	75.4542455	3.660069776	85.62610789
4972.8	4.792762036	74.20175459	3.657947115	80.45829922
4977.6	4.136448241	65.31167641	3.378978614	64.79118003
4982.4	4.706355451	75.19102033	3.683974402	74.72952369
4987.2	4.027499401	53.53798597	4.034291841	71.07312989
4992	3.677955578	81.51233829	3.725383145	78.78071834
4996.8	3.436847147	75.17388468	3.518411488	58.84919236
5001.6	4.415115397	64.53485505	3.361905392	75.92662855
5006.4	4.585130069	67.66081483	3.051579315	71.56829684
5011.2	4.499637455	55.66514672	3.220875942	78.84651348
5016	3.84175367	83.14191451	3.226757832	92.04953827
5020.8	4.474686094	59.81684427	4.255111635	69.54302992
5025.6	4.802066031	72.64178158	3.510281916	67.977413
5030.4	3.684143856	53.25492883	3.671406327	63.43175638
5035.2	4.15295887	69.8998167	3.336085105	70.86234697
5040	5.041382482	41.09398791	3.746924727	75.42893829
5044.8	4.66765576	77.29666138	3.146346618	79.95374435
5049.6	4.233955837	68.51373249	3.035455765	80.53473759
5054.4	4.328002309	70.56500025	3.178466651	71.74578812
5059.2	4.261206975	57.65000228	3.276817567	76.03355054
5064	4.442500767	70.36450172	3.2236467	68.47678767
5068.8	3.623543667	52.82189576	3.630197456	69.44875538
5073.6	4.404946517	74.33265911	3.645584351	66.54503688
5078.4	3.991936986	75.84070511	3.341625963	63.85586841
5083.2	4.406790406	66.49732209	3.503379194	85.07442496
5088	4.333907868	66.37348723	3.310258751	58.9368077
5092.8	3.78245896	76.86673951	3.430399988	71.00873037
5097.6	3.680161416	68.90379141	3.810324106	62.11697924
5102.4	4.625737435	61.45038244	3.082831831	75.84270687
5107.2	3.861714051	80.80317957	3.149504973	84.14552018
5112	3.662122885	99.96968331	3.133158633	79.50202106
5116.8	4.026092439	94.15259236	3.531110264	71.49323232
5121.6	3.796663417	76.11215853	3.376970997	73.06219514
5126.4	3.377391388	91.86324669	3.018755763	75.91787096
5131.2	3.548040268	106.7762131	3.893465905	66.27011345
5136	3.795151484	113.9533822	3.829699849	67.06563719
5140.8	4.188589372	105.5987417	3.171516737	82.98978749
5145.6	3.884750103	101.3352215	3.88552782	78.6186248
5150.4	3.709171831	99.87340138	3.390802559	73.30740062
5155.2	3.926072345	88.3738693	3.18004004	76.93783986
5160	3.493230679	79.28997919	3.640777701	68.69958883
5164.8	4.003986777	89.38870367	3.398485655	80.90357364
5169.6	3.766517631	87.23997044	3.502374336	87.45443572
5174.4	3.460141061	81.85966003	3.364792375	80.99198406
5179.2	3.347827673	88.7867502	3.832390289	66.0014583
5184	3.727908934	121.3014878	3.12861965	74.17079928
5188.8	3.824724271	93.11504357	3.526394442	75.96379562
5193.6	3.429526299	111.6391959	3.67553633	85.69549675
5198.4	3.708993722	88.61478142	3.631974103	72.7231158
5203.2	3.815791952	87.73206288	3.653517613	90.20385975
5208	3.874480555	106.8576042	2.989926368	85.60053751
5212.8	3.899746297	96.36408999	4.363839119	67.8284898
5217.6	3.927634156	89.91893553	3.556401182	83.41167194
5222.4	3.780670136	112.7799428	3.711792177	67.51908857
5227.2	3.893816171	97.10316501	3.571272388	57.31526012
5232	3.515884542	122.3571101	3.605784514	80.9484062
5236.8	4.356926003	109.7650797	3.172877215	94.99141112
5241.6	3.338277818	131.4739813	3.611361866	79.79680236
5246.4	3.98750619	103.3439857	3.827221586	67.64158245
5251.2	3.322141995	109.989429	3.32668494	78.08600068
5256	3.364025368	99.73670728	4.109680562	78.98778934
5260.8	3.893023866	91.10758642	3.864590261	65.56501386
5265.6	3.591467809	109.2123083	3.602550519	58.59368532
5270.4	3.887574085	101.9114059	3.812065131	64.67033767
5275.2	3.065738432	97.29456599	3.007343097	77.6557301
5280	3.463849508	84.76239159	3.607795221	64.80620217
5284.8	3.577828141	88.65752921	3.755194404	64.67922289
5289.6	3.462929248	76.36843721	3.423119373	62.03680781
5294.4	3.359208287	83.60994669	3.58823076	62.79051126
5299.2	3.521729668	81.53673844	3.591051421	71.24787573
5304	3.683047902	105.6314958	4.097887911	61.55164309
5308.8	3.619464953	76.08731424	3.831779963	74.810816
5313.6	3.470253729	96.92781279	4.012491441	57.9284219
5318.4	3.467509492	103.9827741	3.551216241	77.43046163
5323.2	3.293389463	81.15200694	3.415092224	76.02822349
5328	3.734864488	82.92208927	3.367529628	71.21231116
5332.8	3.701168901	96.95439974	3.657043531	76.61521917
5337.6	3.763148501	89.96524211	3.416978417	70.14414295
5342.4	3.636785412	91.04784835	3.09910511	78.24871204
5347.2	3.485009697	103.6381548	3.868548297	58.8254455
5352	3.58180343	95.74180384	3.639346354	53.10269878
5356.8	3.19120321	88.48600502	3.600870753	75.8925684
5361.6	3.327077625	88.50571263	3.31038373	61.43449061
5366.4	3.86165855	106.9210388	3.563192871	72.88945214
5371.2	4.010310577	103.1683714	3.625172911	63.35024862
5376	3.685447382	83.56068993	3.47512997	77.2369411
5380.8	3.547126413	83.86782362	3.425453267	68.0872447
5385.6	3.627234907	94.23589602	3.509356724	63.28344815
5390.4	3.590531074	102.4353719	3.406093608	54.69889116
5395.2	3.785637496	87.93005052	3.606166603	56.34750562
5400	3.336313528	99.37876015	3.711320343	87.52980644
5404.8	3.914108666	110.9531539	3.476804483	60.07075992
5409.6	3.270844359	83.4982089	4.292525129	49.18910175
5414.4	4.334053985	82.46614282	3.513556264	81.80041838
5419.2	3.365559935	80.85494355	3.751386399	55.64155567
5424	3.264741427	97.05817454	3.997704057	75.12947174
5428.8	3.391186888	77.12032562	3.663504769	60.30516393
5433.6	3.831800845	98.26808789	3.649903949	66.83970426
5438.4	3.692886206	103.0503233	3.714664214	56.50800373
5443.2	3.556064886	93.09159237	3.577115379	81.00395426
5448	4.185441039	103.6712224	3.206933657	86.46165602
5452.8	3.406974105	121.8730296	3.988209009	75.4506588
5457.6	3.760011695	98.72647182	3.890247937	70.66024147
5462.4	3.67232619	88.52764504	3.374303946	61.67143084
5467.2	3.947655709	89.84026905	4.474958832	73.17917698
5472	3.785065792	84.05503097	3.330198065	76.83238098
5476.8	3.330504171	90.91625614	3.173194546	74.49745355
5481.6	3.926722189	105.3021449	3.668547476	70.18261503
5486.4	3.720224852	93.17322911	4.007698149	62.15619054
5491.2	4.493115638	99.14036072	3.435256639	77.54467999
5496	3.769283145	110.8815593	3.578986606	79.45554318
5500.8	3.831063484	80.7949884	3.926094944	73.54446751
5505.6	3.975712014	86.44895019	3.065849069	82.40799151
5510.4	3.817196643	63.31968517	3.528705736	77.26030578
5515.2	3.935548414	93.42977182	3.140171546	69.60078399
5520	3.432989928	101.2264816	4.047175649	60.91186136
5524.8	4.407852683	111.9365379	3.326003376	68.7412321
5529.6	3.446737518	105.4628993	3.46620089	56.75384772
5534.4	4.388394674	92.47243153	3.21086598	72.7289794
5539.2	3.406345856	99.8134578	3.088212888	79.07005496
5544	3.792749003	92.86614651	3.932223587	57.83945976
5548.8	4.161144225	90.15819389	3.679362157	60.66316598
5553.6	4.062008564	96.95945336	3.426804601	67.31073633
5558.4	3.507044287	91.06814481	4.136660065	74.36941644
5563.2	3.469258874	78.41168803	3.720094788	71.0057396
5568	3.749427941	95.55811174	3.347150764	71.54981354
5572.8	3.970462058	106.6654997	3.77850159	57.36815139
5577.6	3.559476943	73.90819555	3.37584911	74.66593899
5582.4	3.455878728	105.495934	3.516799126	82.623465
5587.2	3.503575241	114.6767419	3.041606738	93.3811663
5592	4.090710428	115.1356317	3.288843175	76.15442247
5596.8	4.128615575	103.9191538	4.017533757	73.59264037
5601.6	3.38717694	115.0785012	3.119075568	89.04406233
5606.4	3.274115756	79.8743789	3.791123296	70.20928131
5611.2	3.284874608	107.0344178	3.557810361	66.38155037
5616	3.393302721	108.3737354	3.677828556	55.66311126
5620.8	3.471154046	91.71759916	3.359192627	75.66694495
5625.6	3.353855186	78.10366329	3.25667351	81.64592455
5630.4	3.502123929	104.3345227	3.737644185	73.05740148
5635.2	3.39623384	101.6081965	3.716827418	60.35816042
5640	3.410927059	88.83006924	3.512466924	77.65384003
5644.8	3.64284725	126.8504397	3.326121961	74.19764779
5649.6	3.775840388	94.34718903	3.689301965	63.97007204
5654.4	3.802423153	91.26419091	3.267046156	92.19975517
5659.2	3.289790342	107.8739528	3.766451168	79.07601815
5664	3.782163915	100.5665707	4.230460775	58.89928712
5668.8	3.541559922	100.0794638	3.581584576	63.75059668
5673.6	3.677600728	96.16411154	3.163692458	71.924952
5678.4	4.23953924	98.45057902	3.699563424	83.11829795
5683.2	3.44694136	95.01520925	3.384113231	66.65185457
5688	3.632459686	107.127591	3.482939861	66.44169292
5692.8	3.498012714	108.4588239	3.621832505	74.12553977
5697.6	3.932983237	100.353667	3.336966681	67.36192039
5702.4	3.811338626	139.0996436	3.47136748	59.74936887
5707.2	3.901842288	89.19778194	3.636163532	60.66391097
5712	3.615167659	94.42718722	3.263061744	72.58780795
5716.8	3.744933368	97.85215339	3.52740091	84.75495805
5721.6	3.781010484	101.6929136	3.38716206	60.52720286
5726.4	3.492077671	111.5945835	3.64472811	74.07898654
5731.2	3.543588161	110.1555818	4.045406714	75.15687622
5736	3.320334522	92.13367328	3.512265132	52.39840238
5740.8	3.113930367	103.9428235	3.931774118	73.9999006
5745.6	3.527234818	92.84272154	4.083878334	78.63863786
5750.4	3.235441126	81.56035187	3.216832414	68.09494573
5755.2	3.459181319	92.88261393	4.806183382	77.45680728
5760	3.762245186	97.52551374	3.948080731	70.73634258
5764.8	3.555411986	93.70592001	3.384081471	65.00237908
5769.6	3.579167488	120.5676948	3.442542787	60.66861942
5774.4	3.794528384	84.52814531	3.412861035	70.05501936
5779.2	4.301678873	106.6862296	3.546423303	63.08746288
5784	4.216986366	92.97796363	3.221257346	78.55720702
5788.8	3.620048319	104.3177559	3.489178291	72.99585418
5793.6	3.762136345	106.3955276	3.799007597	84.60579949
5798.4	3.873556388	96.39539758	3.155143669	77.62976362
5803.2	3.318872766	87.89455194	3.623266481	71.75873589
5808	3.422675975	92.94683385	4.242908521	76.7798015
5812.8	3.318078373	94.00064573	3.120477219	84.44395533
5817.6	3.773918418	95.59334849	3.504383514	81.40135364
5822.4	3.878728724	87.59161952	3.469212724	72.25834803
5827.2	3.45827663	114.1250964	3.675798512	65.7028736
5832	4.414383445	89.92824547	3.655932898	65.70104428
5836.8	3.644961127	84.25870516	3.748393912	56.04237027
5841.6	4.055092023	85.19039711	3.351759596	76.32471212
5846.4	4.004964674	108.4462912	3.934508624	90.04652319
5851.2	3.790999364	108.1343795	3.199464971	73.84277521
5856	3.921493998	110.2013216	3.128869954	73.91887341
5860.8	3.811531301	103.0843335	3.520937184	54.82541419
5865.6	3.379171899	109.6579266	3.444561422	59.38374675
5870.4	3.237101369	106.3026818	3.247790699	75.46172546
5875.2	4.146969527	100.737479	3.27774131	70.75534669
5880	3.440900874	84.50009123	3.211618989	68.98608071
5884.8	3.9799413	99.06912692	3.619478092	61.40227891
5889.6	3.565098862	111.5543694	3.630380909	69.14431777
5894.4	3.530669419	125.1440298	3.639046367	65.7186672
5899.2	3.394669844	106.095339	3.85042421	60.99763973
5904	3.253424898	110.5911776	3.50005361	81.1081452
5908.8	3.93669059	93.5431788	3.826585385	68.14555931
5913.6	3.255031519	99.92947072	3.334246024	63.69873233
5918.4	3.541396539	82.95164929	3.935502591	64.57801099
5923.2	3.857800777	100.7382374	3.284637888	63.22759515
5928	3.401064809	98.56912834	3.39962012	61.18859745
5932.8	3.694407327	96.17399476	3.608072309	73.59918929
5937.6	4.491471934	87.46025742	3.621483908	81.55984176
5942.4	3.43978326	86.81761394	3.195873271	66.31647209
5947.2	3.371244546	87.74930329	3.516814965	74.83516887
5952	3.54538827	112.2063057	3.412944183	88.22914102
5956.8	3.205960379	111.1853342	3.683090094	55.21045208
5961.6	3.196686843	100.8252451	3.612016327	70.5987212
5966.4	3.837552347	99.93569929	3.206480365	88.80267505
5971.2	3.273713731	97.82832118	3.714749725	75.66780612
5976	3.428694371	89.14342695	3.486799919	82.50720484
5980.8	3.288376414	104.2106352	4.311582042	74.43253829
5985.6	4.326411312	112.9085476	3.3382798	76.57655983
5990.4	3.466724168	115.609833	3.908767559	76.03814808
5995.2	3.762318641	101.6539182	3.413137652	85.54587857
6000	3.382685259	101.1976997	3.566530002	81.66749117
6004.8	3.799586808	112.3019219	3.040573539	70.87053127
6009.6	3.345139531	90.03743934	3.680669023	60.80797405
6014.4	3.821315152	83.54124737	3.428320497	73.29404198
6019.2	3.667588017	87.5885533	3.224046667	84.55188414
6024	3.617214727	74.84257199	3.008507655	82.65844858
6028.8	4.232735742	104.2242361	3.260323817	71.74857436
6033.6	3.793286975	83.97527103	3.350833697	81.03798929
6038.4	4.057553875	94.47766183	3.192152214	77.25822706
6043.2	4.18671442	109.5375718	3.310693917	75.23401339
6048	3.687086624	94.42108138	3.157558173	78.48364546
6052.8	3.50963188	80.97109311	3.278072242	68.28797603
6057.6	3.571188316	94.99599038	3.645771999	71.70244575
6062.4	4.158942004	91.37387812	3.835657294	54.85277449
6067.2	3.450473238	87.3942438	3.341261773	67.06868788
6072	3.647025006	111.8563552	3.529871983	74.27086829
6076.8	4.084479455	66.3806945	3.83407989	82.60950822
6081.6	3.670215768	85.60434963	3.70097634	71.95268929
6086.4	4.004814648	84.63504114	3.431019196	77.99531239
6091.2	4.044710996	90.87182204	3.061798274	84.4808541
6096	3.381370217	101.8259139	3.639867691	68.03671604
6100.8	3.643461533	94.84393205	3.165034219	77.04314773
6105.6	3.737330238	88.02225469	3.517762687	71.27734282
6110.4	3.845421624	75.8292244	3.113755257	89.15099241
6115.2	3.57207193	95.95883779	3.46939349	69.78475004
6120	4.140853537	73.6974862	3.200300194	74.8177395
6124.8	3.68976009	108.6249339	3.713073504	71.70430271
6129.6	4.133778758	105.3741914	3.278151626	90.13664667
6134.4	4.130812442	95.55353264	3.183179153	81.10585165
6139.2	3.593690221	92.49505116	3.48533743	75.18378397
6144	3.506628864	107.6474443	3.446839366	64.25206449
6148.8	3.806630863	96.25232701	3.247419756	68.86389301
6153.6	4.034238615	98.88241719	3.58526443	77.86544448
6158.4	4.044165196	105.5231294	3.881523482	59.32138413
6163.2	3.488215651	102.0408517	3.716297738	66.57166997
6168	3.917023035	104.4280539	3.490221148	80.68766209
6172.8	3.501760422	111.4685861	3.564212355	59.664732
6177.6	3.65934734	102.8360195	4.006548488	62.94918497
6182.4	3.384873066	83.22908714	3.430972257	66.49586213
6187.2	3.933892727	70.21670759	3.470623333	83.84919211
6192	3.887099832	83.50378395	4.025141346	40.2165041
6196.8	3.335727122	99.05632594	3.746671728	46.60146085
6201.6	3.486604708	86.38596643	3.629202354	69.88075153
6206.4	3.357212585	88.55697121	3.408125531	65.17421789
6211.2	3.617205425	98.49476904	3.510445425	71.67366186
6216	4.006079306	87.57758376	3.794432345	67.98140805
6220.8	3.212999088	69.02774	3.900804984	64.61007419
6225.6	3.856549573	115.4441834	3.466596948	75.46348244
6230.4	3.502975273	108.3976452	3.463717684	60.82290641
6235.2	3.563326332	97.53629943	4.066223073	63.9160392
6240	3.587588808	120.5670937	3.81757375	52.37238726
6244.8	3.566620958	97.81554935	3.188364444	81.90641564
6249.6	3.682699926	90.29036819	3.783028231	41.96920891
6254.4	3.284353135	85.26563844	3.123655036	71.4634631
6259.2	3.131583823	98.1304799	3.791058367	64.20976462
6264	3.725191517	87.1328289	3.302933762	75.0904024
6268.8	3.882522002	90.48527125	3.62030864	72.28827661
6273.6	3.576984169	81.18433714	3.231520644	75.88289258
6278.4	3.734645138	93.24929705	3.720142305	60.96645781
6283.2	4.106092176	94.94801256	3.345713141	76.78866895
6288	4.152134889	87.86964099	4.012003373	95.81167634
6292.8	3.645408358	75.18894092	3.715313187	60.76438566
6297.6	3.577402863	92.72884804	3.773705562	82.3056858
6302.4	3.514368912	98.96525702	3.726680142	90.07986394
6307.2	3.871058502	107.3626511	3.107153657	76.227882
6312	3.486625563	92.79444998	3.45347595	73.88132133
6316.8	3.453599153	111.2379229	3.14443796	84.3242459
6321.6	3.430543677	107.907532	3.284216268	69.26544266
6326.4	3.355475851	88.5057177	3.583121405	69.4469465
6331.2	3.312907788	102.4561154	3.714285236	70.79084993
6336	3.832138242	63.94067157	3.939259388	63.34806861
6340.8	3.949421438	76.21440204	3.257753672	66.01351919
6345.6	3.549197031	74.84319962	3.311806095	64.46965519
6350.4	3.733255451	84.53704655	3.640400969	64.62643547
6355.2	3.484876434	74.98797264	3.297798051	82.4317629
6360	3.431437218	89.41407458	3.976558845	70.83653672
6364.8	3.963999535	111.2487391	3.469760412	85.98147154
6369.6	3.71629678	113.8995914	3.605897553	77.79865612
6374.4	3.477728371	87.36548376	3.559737794	72.17646977
6379.2	4.217444362	102.0231938	3.431689774	73.63340075
6384	3.907204564	78.13819418	3.514132115	96.12849655
6388.8	3.892133748	100.8325817	3.890678653	74.18514825
6393.6	3.695927072	124.9874027	3.354117942	76.21447057
6398.4	3.401211934	89.75873024	3.313661606	75.03501162
6403.2	3.911208525	104.3616802	3.882259997	58.93777742
6408	4.088594619	112.3650234	2.949459109	71.36437953
6412.8	3.594478771	98.31826495	4.07717842	55.80356695
6417.6	3.172362676	94.3485791	3.382962151	77.5748761
6422.4	3.489860997	80.51225067	3.561858967	77.90710208
6427.2	3.943443169	96.57215445	3.355648325	72.28765645
6432	3.653919927	118.1623722	3.605279123	74.95074392
6436.8	3.762813192	77.29204914	3.739248956	62.39770592
6441.6	3.453429533	101.6244965	3.407112954	57.38461345
6446.4	3.282392971	87.10246434	3.349706577	68.47370537
6451.2	4.125279455	111.5868005	3.313650281	62.74071382
6456	3.866522018	79.6255393	3.925876603	80.91194542
6460.8	3.729307842	96.11211342	3.263829909	69.2160501
6465.6	3.655008242	90.76706683	3.955353384	57.74802807
6470.4	3.640017777	101.9957612	3.542207394	64.33249341
6475.2	3.502801776	82.42295977	4.01654195	56.17000586
6480	3.568239812	94.8210356	4.268570334	60.72912682
6484.8	3.399935986	75.12072714	3.667544307	59.93227346
6489.6	3.440922235	68.21043859	3.584580659	85.41583936
6494.4	3.374277807	102.5241059	3.765420269	58.64242629
6499.2	3.627393104	77.2516371	4.03662329	63.08072553
6504	3.82962351	95.89928603	3.799339307	56.32984882
6508.8	3.549757277	102.5859112	3.568425371	79.55762159
6513.6	3.168503608	73.84732738	3.517282484	71.66807964
6518.4	3.650226534	89.75079404	3.847856125	55.56180944
6523.2	3.70115892	104.2581214	3.587265152	89.1259591
6528	3.35038106	111.0234761	4.007394492	72.85792749
6532.8	3.467765026	71.27748951	3.864228743	52.95878612
6537.6	3.547850794	116.3362477	3.67463004	68.52501304
6542.4	3.363248752	111.551809	3.477788586	63.31639476
6547.2	3.772230094	76.14234141	3.417185177	74.82836347
6552	3.810408556	83.37590166	3.626116421	72.51655265
6556.8	3.339424588	73.9140495	3.620953128	63.98711163
6561.6	3.453392674	69.89221984	3.42500661	89.41149613
6566.4	3.559827706	100.6909606	3.313779995	80.93069032
6571.2	3.349024217	83.3312075	3.63080935	75.00408573
6576	3.684760654	84.35782432	3.006139686	83.01860001
6580.8	3.451071719	109.6434336	3.717086348	77.80884551
6585.6	4.004078107	92.81217535	3.804965906	59.10604656
6590.4	3.420042158	124.8449669	3.358191614	69.05113062
6595.2	3.392289938	109.4317307	3.420240827	63.26702621
6600	3.578326792	106.049843	2.858155254	85.78514916
6604.8	3.428759767	108.5887539	3.412950031	66.92563912
6609.6	3.590342276	80.98382921	3.233796816	74.64123154
6614.4	4.107623379	98.81052248	3.825695839	77.32323574
6619.2	3.83938606	66.741375	3.276191622	84.69338512
6624	3.540989823	105.0539876	3.433969173	89.74779589
6628.8	3.246119674	67.50572502	3.851620563	69.16885425
6633.6	3.199000021	102.462874	3.816585019	84.09169178
6638.4	3.707103957	82.15785439	4.010120497	55.68309704
6643.2	3.615859341	90.8792087	3.355607016	74.20700833
6648	3.601645358	76.14446216	3.57346631	66.49167883
6652.8	3.687817895	110.0940317	3.682952065	67.17724455
6657.6	3.646196408	113.8546102	4.220780536	80.75788553
6662.4	3.361671221	89.33214795	3.634299175	69.4419542
6667.2	3.876572095	87.95243351	3.380390866	80.84126561
6672	3.977762009	79.04549585	3.503543211	75.24099664
6676.8	3.830851875	70.06963105	3.368003685	70.25044363
6681.6	3.732076804	78.63900566	3.388124826	66.39638795
6686.4	3.247677916	83.75034198	3.871988899	81.53763796
6691.2	3.788351399	69.86416802	3.495980162	65.0144635
6696	3.314594789	71.1268449	3.649135973	74.96725731
6700.8	4.046405451	86.2693896	3.527744121	67.54124658
6705.6	3.556899108	61.2384766	3.067275014	75.37219873
6710.4	3.888826098	85.02480752	3.875075413	57.21434434
6715.2	3.73680349	90.48536817	3.47321699	75.94333815
6720	3.21318554	83.96739904	3.630163192	68.56954469
6724.8	3.450431018	72.85585272	3.472342716	68.35877048
6729.6	4.339561302	82.20337443	3.467095554	73.76041457
6734.4	3.53675366	84.78626224	3.292141144	71.95536061
6739.2	3.430467575	76.85620695	2.953563069	87.2491127
6744	3.404404856	67.28279758	3.843582977	71.73941747
6748.8	3.467029033	78.62220716	3.509526746	65.56405989
6753.6	3.346051659	88.52149438	2.974078801	85.8492802
6758.4	3.894488027	103.7185429	3.935203014	66.69832078
6763.2	3.489339691	109.0917145	3.873975956	82.69547501
6768	3.439472419	76.54866434	3.640192886	69.51691099
6772.8	3.754472917	91.98382314	3.169595646	76.97478099
6777.6	3.567105547	92.38270949	3.526784966	92.33538315
6782.4	4.357803208	97.71147633	3.877828881	71.93233238
6787.2	3.673443229	58.97071556	3.667809667	75.29608073
6792	3.613744816	87.28209394	3.495135994	79.82747364
6796.8	3.713579756	110.1142376	3.60660075	64.85529477
6801.6	3.503039694	100.8787652	3.864679614	89.05669245
6806.4	3.349399348	76.17606337	4.119620713	52.05319321
6811.2	3.374748942	71.52213873	3.229511192	75.82236427
6816	3.735203355	86.41956365	3.79962978	78.15715654
6820.8	3.377907026	91.27929971	3.474004179	72.23547982
6825.6	3.634517622	97.72616414	3.569978283	61.34979711
6830.4	3.816552857	103.2507396	3.272668942	80.86472323
6835.2	4.23499481	90.59839404	3.239590762	75.11560067
6840	3.958600396	121.2920672	3.883484803	78.22080545
6844.8	3.696627911	99.44603628	3.939715949	87.75470393
6849.6	3.589071495	90.81475084	3.245098192	82.21401949
6854.4	3.603265637	122.9099586	3.936896286	65.01228113
6859.2	3.537466569	105.8925521	3.566483269	68.20060095
6864	3.366285602	92.37373208	3.603057916	81.41281727
6868.8	3.23653138	131.4233264	3.568707413	92.28078646
6873.6	3.547149444	96.96508539	3.835624164	71.56549401
6878.4	3.67841089	100.303318	3.319806242	77.26203507
6883.2	4.125449992	82.40305737	3.849492444	78.76984606
6888	3.581835922	85.63181765	2.959998386	83.3720466
6892.8	3.888953846	96.67126569	3.221001547	71.7026861
6897.6	3.560025144	111.5725921	3.5836762	76.06835156
6902.4	3.724742661	107.6545539	3.576073491	50.49336988
6907.2	3.779808288	80.66998719	3.534471087	74.11184374
6912	3.864445091	78.88308161	3.639457643	66.1781258
6916.8	3.508017227	98.69844584	4.049093594	78.13142517
6921.6	3.653299278	126.7419896	3.933099734	90.64060889
6926.4	3.635287801	96.44036856	3.608614829	58.79873707
6931.2	3.761806992	91.21486282	3.703598474	81.00433516
6936	3.298296613	100.9755967	3.543498432	69.17954987
6940.8	3.744769765	77.76904667	3.617250775	75.1652576
6945.6	3.738674544	110.3355931	3.57513429	73.09376211
6950.4	3.360935956	92.68819203	3.312938558	86.88465079
6955.2	3.418728835	100.7380855	3.495842996	75.29544071
6960	3.767408941	86.80664509	4.27990014	72.50832026
6964.8	4.038330226	113.6481937	3.23453653	69.23555458
6969.6	3.418558891	92.18395701	3.48246951	76.62060158
6974.4	3.571860529	80.32760256	3.53978608	69.987254
6979.2	3.353606835	99.76215216	3.444109879	61.66064343
6984	3.785335056	98.69835189	3.440695694	85.36842025
6988.8	3.827258983	93.64035777	3.494597162	71.6406788
6993.6	3.827848919	73.03017439	4.21008639	47.66724804
6998.4	4.390936365	86.5359308	3.487436982	82.01794807
7003.2	3.778546217	101.122395	3.382773448	73.4487022
7008	4.255971933	80.855185	3.324779279	74.87334024
7012.8	3.928727227	100.0484709	3.305915154	81.05383383
7017.6	4.2706861	70.04794968	3.639835803	71.57111458
7022.4	3.468790742	89.18164874	3.8457815	53.99080857
7027.2	3.234638468	79.42369471	3.695969329	85.79387085
7032	3.558540996	109.2991747	3.350061916	84.74631477
7036.8	3.513963607	84.37415637	3.456075579	68.39864654
7041.6	4.12704099	104.3661587	3.390886097	69.36287652
7046.4	3.804635528	97.63461066	3.49201837	72.95370605
7051.2	3.72731337	105.4322005	3.763598016	66.09947078
7056	3.687096087	82.30111681	3.32527451	105.6890924
7060.8	3.900471832	78.32392144	3.697707643	90.28698917
7065.6	3.855546947	102.4657663	4.233496842	53.72177841
7070.4	3.703360732	106.8721369	3.707501619	84.37897902
7075.2	3.486785305	89.63118705	3.947887766	58.81232597
7080	4.285082361	91.4951819	3.655806436	59.45944329
7084.8	4.114886049	108.7172598	3.682546728	74.20731738
7089.6	3.703565859	92.62309565	3.47785776	60.22042161
7094.4	3.826625804	88.11175249	3.821362643	70.68791197
7099.2	3.224321377	83.81982444	3.64541722	61.68880821
7104	3.763819214	93.19591442	3.498370161	51.22729378
7108.8	3.628145375	91.49192254	3.510112134	66.7306951
7113.6	3.40104862	83.67726722	3.521680921	88.43081654
7118.4	3.901618981	87.31169271	3.509547837	60.82949583
7123.2	3.613772943	79.24886024	3.08616281	81.92420539
7128	3.515968733	86.82829124	4.083865809	63.78913394
7132.8	4.351967626	76.34212624	3.508469837	59.32972676
7137.6	3.612967492	79.33111891	3.167398581	82.8449096
7142.4	3.8859678	75.68538471	3.374696919	69.60212593
7147.2	4.085969729	96.3152117	3.15425328	80.27379486
7152	4.258472073	106.9647811	3.436680296	70.37023411
7156.8	4.169301234	121.890775	3.608895295	65.63543386
7161.6	4.539026466	84.81717436	3.500058126	81.49293839
7166.4	3.91113556	88.92330644	3.538742398	72.05566273
7171.2	3.965361886	92.10126704	3.442473051	81.51040756
7176	4.117166202	105.051472	3.620088696	75.27404114
7180.8	3.911223287	104.8540892	3.174409291	76.48678613
7185.6	4.013168061	90.59446462	3.310388233	67.19590453
7190.4	3.551293593	90.94124741	3.598142827	68.56063661
7195.2	3.504335373	116.475814	3.909525071	63.42905679
7200	3.890016769	99.16587793	3.606300859	76.10652963
7204.8	3.704141564	83.0123367	3.438327312	72.57747714
7209.6	4.207193345	88.24533756	3.431413488	59.9046234
7214.4	3.484063488	96.80552235	2.866242585	89.14687007
7219.2	3.7120139	91.97057482	3.823283753	65.70122837
7224	3.620646206	92.10390265	3.515956225	68.31522292
7228.8	3.623566898	74.50438937	3.39175168	71.50406934
7233.6	3.479807526	92.75119626	3.265954227	85.84493459
7238.4	3.353426583	81.25281497	3.6760762	77.94867511
7243.2	3.640867251	113.1520757	3.413622823	85.67404091
7248	3.840266088	94.78008422	2.979626922	77.90234883
7252.8	4.257770931	94.82892953	3.072641164	87.7649186
7257.6	3.995931535	95.71393343	3.385680959	75.76710769
7262.4	3.749021363	78.85382758	3.58815826	78.96361952
7267.2	3.546099292	110.7193578	4.297212502	52.40496695
7272	3.358200495	83.98546476	3.960762069	77.11383477
7276.8	3.462050007	94.41076649	3.328583738	81.83111887
7281.6	3.765314185	70.56667425	3.394796663	80.68074446
7286.4	3.424232231	83.24905995	3.513368563	64.81044628
7291.2	3.410876756	101.6047089	3.184707343	64.38238602
7296	3.238199484	93.76651637	3.306105823	64.66117297
7300.8	3.773186508	77.91129616	3.52126201	64.43495463
7305.6	3.690580134	86.65963496	3.816241864	59.71187883
7310.4	3.435830547	80.45057441	3.626861545	61.16048833
7315.2	3.397873389	89.82360257	3.258237723	75.61533941
7320	3.951268936	76.96717998	3.380180525	69.821221
7324.8	3.690013639	129.4433788	3.369568895	88.91397403
7329.6	3.740787713	81.34722001	3.562202526	70.43655372
7334.4	3.845314837	105.3673234	3.592122223	71.25420321
7339.2	3.647158411	102.9327097	3.528328459	70.8652566
7344	3.981165936	105.8647142	3.886264705	80.61219347
7348.8	3.370086945	81.95807301	3.394175906	64.33463163
7353.6	3.370715517	108.0740437	3.099415206	83.62754055
7358.4	3.779380849	93.99200877	3.986028704	59.42643866
7363.2	3.429887837	98.11304582	3.334384238	62.87458651
7368	3.504198733	83.90886647	3.202681426	67.33411626
7372.8	3.410021889	95.38349011	3.310142522	75.98710407
7377.6	3.729267008	79.87132362	3.509002307	69.72865539
7382.4	3.74122227	96.15821097	3.400592119	67.95432604
7387.2	3.765457668	70.97304599	4.010036983	74.95648441
7392	3.582087853	102.3507141	3.755120306	80.98690743
7396.8	3.347858308	95.52999219	3.439047834	65.63643074
7401.6	3.451166733	94.25861733	3.105350197	79.23082667
7406.4	3.59002522	101.4853201	3.61960788	63.66787188
7411.2	3.444332253	88.28627232	3.652907878	62.75706023
7416	3.560653322	102.1432326	3.599386098	59.08076277
7420.8	3.237568967	85.62328572	3.686972067	76.23076628
7425.6	3.483262285	113.2999651	3.926038934	59.31673679
7430.4	3.21759565	122.0074476	3.972211179	41.91600258
7435.2	3.376467777	91.51113587	3.831969092	71.40452824
7440	3.371532611	101.7637214	3.346238282	59.97669509
7444.8	3.384923877	93.02628993	3.557969789	67.54834689
7449.6	3.719825325	117.7753549	3.398208989	68.07560892
7454.4	4.191887377	94.35470802	3.767610385	72.62880684
7459.2	2.982879907	119.8200907	3.960423762	63.4209986
7464	3.596331148	72.77541032	3.830847733	80.69552992
7468.8	4.158639485	80.13846817	4.065996957	62.03645453
7473.6	3.372779484	88.83197906	3.921950776	58.69136347
7478.4	3.416382538	94.78297269	4.135855254	56.76825868
7483.2	4.088156042	77.39452481	3.96004658	68.74105119
7488	4.10185095	80.2493618	3.452428217	67.6967724
7492.8	3.748252821	93.87947842	3.92926369	70.39992791
7497.6	3.180033598	93.642061	3.730301951	71.55126255
7502.4	3.564475156	98.9864902	3.391206617	67.0087261
7507.2	3.151571726	94.17906049	4.160536721	71.87177423
7512	3.403837126	68.70101857	3.308554106	75.51909359
7516.8	3.711383048	99.51538285	3.558942715	63.85309671
7521.6	3.614954475	77.6408217	3.296118589	77.88926703
7526.4	3.333196146	85.44617546	3.87519201	81.18689133
7531.2	5.015869509	58.8642476	3.660597122	76.1435921
7536	3.520431388	86.61782632	3.777053516	59.29794098
7540.8	3.804726951	56.34294994	3.762598419	53.2676976
7545.6	3.433786753	70.03727422	3.576287177	71.80933403
7550.4	4.066580911	44.81885686	3.278892841	74.88822449
7555.2	3.230393327	74.02907032	3.671734886	61.74946595
7560	3.643539741	88.45536057	3.818345483	61.65949167
7564.8	3.546859765	63.55308521	3.686587326	84.12075164
7569.6	3.834092693	97.66259088	3.827325503	84.27300591
7574.4	3.785013869	70.87477212	3.304722104	71.24553382
7579.2	3.479433034	99.25946212	3.489962431	82.91216351
7584	3.443274281	99.70087881	3.765922948	69.27223029
7588.8	3.743590357	82.27244335	3.489534781	63.14679999
7593.6	4.010006287	54.52950842	3.842053629	70.02231382
7598.4	3.587731608	93.71583056	3.588784554	59.82222829
7603.2	4.17539425	45.435581	3.749947958	57.57565742
7608	3.51831219	84.26783777	3.959011116	46.76151909
7612.8	3.558083851	79.42538747	3.500131385	65.86616175
7617.6	3.408517414	71.81440572	4.199911432	63.04191711
7622.4	3.648846187	74.07501816	3.793083103	71.11773662
7627.2	3.676947497	86.3552566	3.766380487	61.80993248
7632	3.424410094	70.02235364	3.489036007	55.53105206
7636.8	3.561345038	76.15444688	4.538279807	74.09843786
7641.6	3.830507703	81.19439511	3.750972398	67.98888044
7646.4	3.708054166	64.07758952	3.693977905	58.35705311
7651.2	3.970148311	48.88823418	3.47172274	62.89856575
7656	4.414476578	70.04249202	3.215586072	77.5471606
7660.8	3.964097261	77.97633256	3.616230364	49.79601846
7665.6	3.625281852	95.81274849	3.47136805	71.6741701
7670.4	3.329436181	84.14523687	3.560008921	69.69254791
7675.2	4.259088136	58.13347521	3.348199685	77.61346956
7680	3.77335132	64.62845597	3.455466863	66.43473403
7684.8	3.933304236	58.59128235	3.602216938	61.10510285
7689.6	3.865028802	76.34603327	3.194515524	70.17918873
7694.4	3.517332292	88.20827304	3.503117915	61.19999269
7699.2	3.447495611	110.2584337	3.652758784	57.74546826
7704	3.597118905	81.42289824	3.733440345	57.99652729
7708.8	3.661627621	100.7344385	4.196455679	48.51822567
7713.6	3.877620998	74.17652021	3.593560552	72.61460057
7718.4	3.531703975	101.1829884	3.980927703	63.55892501
7723.2	3.63844177	88.49861723	3.79307261	60.81521622
7728	3.235622962	97.07811571	3.486766803	68.2679355
7732.8	3.655981959	81.95605563	3.48703382	80.11248956
7737.6	3.123195746	105.8388659	3.39694828	78.81404859
7742.4	3.530632195	86.10647	3.415942758	79.9797211
7747.2	3.534713745	85.98860622	3.594384813	52.96029011
7752	4.139502952	77.65617636	3.822304987	63.15696757
7756.8	3.934492335	74.63819587	3.366559472	68.60036862
7761.6	3.664000662	91.69251188	3.794668546	64.30639741
7766.4	3.285530949	75.42576224	3.575844053	95.70438662
7771.2	3.44196082	90.81709422	3.621075614	65.11305412
7776	3.565052341	102.0686698	3.563223315	72.86160649
7780.8	3.51266588	94.38439568	3.276291414	81.3330914
7785.6	3.243513818	80.83671552	3.47131863	77.75154708
7790.4	3.303314856	75.2483315	3.640303019	67.72310697
7795.2	3.43807915	73.96922703	3.468754024	73.30953136
7800	3.355111411	79.79635472	3.307051821	72.01331654
7804.8	3.344034417	87.54101025	3.930870809	62.15839218
7809.6	3.876846833	77.90746038	4.62517668	52.57700484
7814.4	3.151148519	90.92261133	3.824746457	53.09703805
7819.2	3.490817561	63.24353587	4.285255751	75.71950124
7824	3.702160165	61.84906479	3.818856436	66.12901286
7828.8	3.165580932	83.4234655	3.538992085	60.15428399
7833.6	3.440530304	88.35706696	3.297845112	62.91241059
7838.4	3.266171892	81.68716435	3.469044131	71.93634922
7843.2	3.55556915	75.2824378	3.356144406	77.52639775
7848	3.876081361	94.50180604	4.233621542	77.25758266
7852.8	3.889490648	93.91518166	3.782236572	69.64245618
7857.6	3.755518154	89.53348243	3.405067448	68.75711015
7862.4	3.924499542	84.53902119	3.391044749	88.90674884
7867.2	3.598616514	80.77720258	2.891191575	90.05240115
7872	3.839399805	70.79755072	3.587792252	85.46759563
7876.8	3.381578936	81.60693595	3.671451954	76.26782279
7881.6	3.357008465	88.34732921	3.369101683	85.57994869
7886.4	3.950586728	80.38522267	4.011631311	68.88538731
7891.2	3.531230064	93.92999103	3.281463172	77.13245499
7896	3.481750284	78.48924858	3.356166681	70.66263674
7900.8	3.046997637	79.13445083	4.034273817	70.94855349
7905.6	3.421111757	101.7939961	3.830811764	76.43760011
7910.4	3.819573944	72.80849269	3.831352493	72.22915153
7915.2	3.467723347	78.35017318	3.598225716	75.95776857
7920	3.468806981	84.4588676	3.436434152	76.37940223
7924.8	3.788922032	59.49533069	3.93663424	81.32485687
7929.6	3.569954771	80.11090289	3.575904891	63.09186837
7934.4	3.644982372	82.13044418	3.734551363	59.40424242
7939.2	3.855344101	79.55283446	3.859472301	74.88238096
7944	3.635241547	56.16737816	3.518360451	58.2434472
7948.8	3.850996434	69.50018479	3.530894697	76.94753033
7953.6	3.517966895	62.88392391	3.744353101	66.54997208
7958.4	3.678565399	77.62961038	3.658453453	63.79688336
7963.2	4.10487005	91.88735431	3.769900172	76.37278251
7968	3.519533578	84.56518817	3.565902264	58.44096432
7972.8	3.552365417	103.6226017	3.667950817	83.13646299
7977.6	3.834395769	89.76356272	3.963287064	62.32502688
7982.4	3.773910529	83.20568708	3.276711436	82.46784821
7987.2	3.884466662	72.78535364	3.321381958	67.2652045
7992	3.583065791	106.8634175	3.652258507	87.33863775
7996.8	3.792175972	71.00465496	3.509036384	77.16617484
8001.6	3.189433845	89.334119	3.638825814	67.65153843
8006.4	3.323349184	76.56959655	4.321268725	83.05810623
8011.2	3.42520165	83.25174286	3.852239344	74.90512537
8016	3.394411784	70.42727293	4.09875995	65.89716519
8020.8	3.545151976	91.23922401	3.827403165	68.49824203
8025.6	3.683670151	88.49436967	4.37151676	63.87294309
8030.4	3.452100215	72.53885935	3.621073038	69.33308228
8035.2	3.513609732	76.11741676	3.741515706	61.78664974
8040	3.384160073	78.48006869	3.938147452	69.17339646
8044.8	3.320797061	76.78518585	4.915045085	88.56937181
8049.6	3.445234641	89.34888325	3.431119731	81.77169556
8054.4	3.51716605	77.69796838	4.01737986	81.26764738
8059.2	3.479738616	108.2074282	3.584623669	60.54606306
8064	4.02888762	97.85355071	3.457489692	75.71613557
8068.8	3.748196161	79.20330831	3.270362727	61.17293025
8073.6	3.274738959	102.3151145	3.576499124	67.58981514
8078.4	3.430199234	100.3816961	4.105189965	52.47383311
8083.2	3.770515974	73.70657263	4.042998082	63.7386687
8088	3.494984044	91.60925047	3.909884246	74.11594057
8092.8	4.460615523	80.51661315	3.537265157	72.72775716
8097.6	4.150259455	86.34330913	3.535558698	54.35216222
8102.4	3.621241458	93.05673972	3.540109364	69.93822389
8107.2	3.453099575	99.51909676	3.743381789	64.58596373
8112	3.828535285	102.2474406	3.88902626	75.45317016
8116.8	3.963655448	82.38328237	3.935942889	70.87731975
8121.6	3.87246464	90.14721373	3.624695556	90.01523775
8126.4	4.225611416	84.07303601	3.825301745	52.6848093
8131.2	3.636967549	101.4171066	3.289954158	71.19359569
8136	3.213949706	75.01711183	3.730723678	87.10755103
8140.8	3.74524378	104.4210281	3.965146741	77.27956781
8145.6	3.715260661	93.95209272	3.988142023	84.4922778
8150.4	3.40667893	76.51140887	4.434394314	93.71829171
8155.2	4.057735532	79.07298065	3.940574476	67.25062219
8160	3.653782817	66.33979736	3.819515063	62.57732492
8164.8	3.428763276	65.58692185	3.691895417	68.865226
8169.6	4.154358377	91.07078974	3.551076462	86.98376608
8174.4	3.698918086	84.09165252	3.457719627	87.34220959
8179.2	4.131289657	82.83877997	3.558157944	77.75856566
8184	3.802729054	83.51052867	3.53645612	68.57414962
8188.8	3.573870931	81.09030728	3.270100182	71.98176348
8193.6	3.73663752	105.804578	4.023376508	78.68558695
8198.4	4.136092462	87.61129928	3.93923028	73.84380536
8203.2	3.332135816	96.07752736	3.544438607	54.27990968
8208	3.69432373	83.22678009	3.733182705	62.54687902
8212.8	4.01037673	84.19063688	3.162165964	65.49063824
8217.6	3.334283044	83.24855949	3.720801323	56.7701006
8222.4	3.856687252	71.19820721	3.854283489	75.75803363
8227.2	3.456866059	95.31974875	4.330244044	57.58414363
8232	4.976570665	68.60118764	3.777875822	63.5457277
8236.8	4.059655205	41.64821898	3.854772443	62.56012292
8241.6	3.556898427	109.1394089	3.728628127	91.78383967
8246.4	3.622787486	97.68342237	3.890256566	86.61043928
8251.2	3.654577363	115.7600146	3.044703506	92.54789722
8256	3.612120019	102.2473079	3.509625278	75.58610432
8260.8	3.812165985	111.0084917	3.815258652	40.36518703
8265.6	3.917976964	76.800251	3.439434388	62.5451749
8270.4	3.750329405	54.71432434	3.312849049	82.0503136
8275.2	3.49630722	84.93186722	3.364482889	87.99675108
8280	3.414741201	100.5790685	3.797897294	66.28445342
8284.8	3.275935542	97.84689394	3.631211901	53.32920831
8289.6	3.397782196	95.45242614	3.602915208	75.68356557
8294.4	3.885832836	101.2346954	3.827747047	48.81978821
8299.2	3.337553755	79.40324524	3.746988644	66.96730546
8304	3.890764087	68.95257165	3.833116681	48.91159825
8308.8	3.315956702	88.75270903	3.309179994	73.67627303
8313.6	3.488204888	90.58385112	3.427041825	81.01743893
8318.4	3.372352016	86.18400703	3.778414163	74.47938954
8323.2	3.236819672	90.54769916	3.890257975	79.64703362
8328	3.372858561	77.41558874	4.048025791	70.54464795
8332.8	3.343779355	93.78577184	3.583917245	62.17492448
8337.6	3.34248102	84.6976495	3.502502356	73.1629616
8342.4	3.556095684	60.4109125	4.200914802	45.22295362
8347.2	3.363831417	88.53839127	3.860536065	64.11498758
8352	3.319494683	75.57544902	3.605009929	55.49736738
8356.8	3.762367636	97.04358615	3.877608095	53.14711406
8361.6	3.755150014	81.6366872	3.672276717	60.17104578
8366.4	3.598623986	88.77889333	3.463470743	62.90920518
8371.2	3.402380632	98.5215436	3.480130389	48.67319732
8376	3.681930915	84.63299277	4.020183691	109.9693552
8380.8	3.125233521	102.3892344	3.222766625	73.12341849
8385.6	3.68324864	85.50952774	3.696078582	60.35906681
8390.4	3.255853142	113.971297	4.103472744	56.38811708
8395.2	3.388765158	124.3464797	3.901445785	62.57491282
8400	3.589333172	96.6547815	3.827953634	65.60349811
8404.8	3.047788137	101.8561437	3.628785604	64.17961974
8409.6	3.265242514	90.57431621	4.149921618	51.80411448
8414.4	3.206879864	115.8532817	3.39772765	65.6911447
8419.2	3.445346799	106.0710772	3.497768573	69.20524192
8424	3.092065132	85.91616265	3.861410852	64.96036763
8428.8	4.163433828	75.70647525	3.99409779	74.66843488
8433.6	3.348502576	80.0264848	3.771335538	62.54122979
8438.4	4.286846216	70.9121929	4.105634159	76.02109317
8443.2	3.322297155	69.69862935	3.481813433	62.91174689
8448	3.484943407	69.85709056	4.030867662	69.83394183
8452.8	3.542183129	73.58376368	3.686773936	62.0832839
8457.6	3.352372794	76.26030569	3.380785875	68.9035308
8462.4	4.038754332	75.44592364	4.015760594	53.96533835
8467.2	4.107147187	82.55686765	4.024937185	53.44370137
8472	4.402919444	45.73116676	4.484415182	44.95615535
8476.8	4.339404839	91.116358	4.202935116	60.93203272
8481.6	4.202904514	43.49978708	4.165157763	59.11869052
8486.4	3.201831503	83.36182556	3.690060415	64.81724262
8491.2	3.624666779	68.67198077	3.613794538	65.51804437
8496	3.755395091	69.87401264	4.272366543	37.01138243
8500.8	3.531276435	59.05834187	4.578036535	55.500944
8505.6	3.486097187	80.20012945	4.469171259	50.73239814
8510.4	3.950928422	69.96836962	5.323989396	21.88414064
8515.2	3.595306968	75.58974396	4.780221299	41.46493975
8520	3.166279028	82.94007256	4.933662606	29.95182198
8524.8	4.008223693	61.53548435	3.804849625	40.99219617
8529.6	4.244267486	98.97046856	4.471096729	50.98548366
8534.4	3.848874948	88.97561612	5.324409378	39.9669594
8539.2	3.305406763	97.51066809	5.197044113	54.78418207
8544	3.885963444	87.81797229	4.789789079	40.58593047
8548.8	3.390259762	82.07269641	5.14185366	44.68638671
8553.6	4.025212457	105.207779	4.983838049	36.37284522
8558.4	3.212623532	78.96569897	5.159546176	43.90382221
8563.2	3.712835733	86.57713466	4.546511865	50.35204056
8568	3.400621994	74.91457492	4.35689356	68.18345063
8572.8	3.741213205	81.4512493	4.546581722	29.58462847
8577.6	3.75184098	74.95490303	5.00253877	33.4518633
8582.4	3.859405346	81.63267417	4.689243805	54.66424254
8587.2	3.211248149	72.69222631	4.757178053	50.69144628
8592	3.822425006	91.76935664	4.964452644	29.38154584
8596.8	3.189857522	85.38289776	5.012828904	32.55664293
8601.6	4.044562362	97.47019498	4.313274021	28.81922116
8606.4	3.191028629	90.97677954	4.922774733	28.27742813
8611.2	3.453478814	103.535477	4.328179491	40.68794949
8616	3.571473752	78.94480571	5.097643851	27.37624235
8620.8	3.978782336	73.6473169	5.62292319	37.64474312
8625.6	3.664174046	98.44105622	4.832881798	56.81520622
8630.4	3.911245156	94.78854275	5.129685571	36.96845698
8635.2	3.481010333	117.4153494	5.142241104	32.66326952
8640	3.484949568	89.3727533	4.367863082	33.78069631
8644.8	3.08020217	88.8050145	4.741867667	36.01419281
8649.6	3.545026623	90.61073827	5.124103938	13.24811531
8654.4	3.397870431	88.74606468	5.418184793	6.202311154
8659.2	3.349261384	92.27220222	5.515056531	22.948113
8664	3.739579706	85.67448233	4.592080678	18.64433367
8668.8	3.449773871	73.91378122	5.484917513	5.638525916
8673.6	3.34914569	77.20004293	5.602732826	10.5628633
8678.4	4.059192974	93.93429758	4.785867007	27.17793394
8683.2	3.70485521	98.9789345	4.807657215	44.41576661
8688	3.838261485	86.50597381	5.015493363	50.65379964
8692.8	3.956543352	104.819421	4.541283014	52.56041011
8697.6	4.032643645	71.12270029	4.496050943	47.75761102
8702.4	3.422450751	87.27898415	5.074515112	33.25573712
8707.2	3.358294075	93.00938558	5.540364876	49.69126652
8712	3.141565967	98.40283312	4.884768546	25.98189478
8716.8	3.474729686	71.73276508	5.096906635	52.00852055
8721.6	3.433487327	89.25465959	4.493001665	58.8507789
8726.4	4.022583971	94.89176634	4.444422405	25.90402174
8731.2	4.065723936	98.13023417	4.883795789	42.53562919
8736	4.444295812	108.2352028	5.002549034	16.07687694
8740.8	3.724473835	94.68768633	4.548411723	17.1427698
8745.6	3.654144326	79.32521998	4.910442543	14.62433987
8750.4	4.05738632	101.319664	4.882717598	38.72423551
8755.2	3.69291274	75.14564972	4.572928077	22.90614278
8760	3.589704471	95.25549806	4.526414584	37.47229819
8764.8	3.581600217	86.7347808	4.41299222	31.6781526
8769.6	4.110069014	111.3495911	4.170748295	35.96559968
8774.4	3.935493838	100.2756432	4.614578898	42.10197642
8779.2	4.111704644	79.22061284	4.860523035	33.52574665
8784	3.982088759	91.76885139	4.319965393	39.82470004
8788.8	3.872201329	67.52252893	5.17927628	64.3094741
8793.6	4.163086346	84.94964599	5.185028677	38.75764393
8798.4	3.712683112	70.65866362	4.622208673	35.36933219
8803.2	3.995976996	92.5185194	5.393827444	47.24164149
8808	3.321960631	97.98329439	4.605516517	55.1605825
8812.8	4.236542422	89.87735174	4.65975322	52.25977096
8817.6	4.67487628	72.93817077	4.909300842	39.10944441
8822.4	3.808388413	69.30309143	4.563479186	44.46310583
8827.2	3.349287529	111.0546576	4.953829876	25.75767651
8832	3.562976027	78.58475179	4.649452717	33.93993894
8836.8	4.155952004	87.45873243	5.210454501	63.4562168
8841.6	4.05119836	81.11347996	4.952128067	35.30607232
8846.4	3.875171788	66.60612411	4.657215905	31.36128094
8851.2	4.430716063	80.30281638	5.706912716	55.83591288
8856	3.839135073	80.6784346	4.856220008	29.34308613
8860.8	4.314347603	73.4220286	4.744092571	43.36762001
8865.6	3.543982001	97.29419343	4.940494982	51.72523659
8870.4	3.88697631	78.28122741	4.94554643	36.04380934
8875.2	3.332563698	95.35703906	4.358907585	23.78826948
8880	3.631839617	77.58804848	4.789767492	46.44787083
8884.8	3.264986232	84.38520676	4.739991165	34.85463185
8889.6	3.467215827	116.2989812	4.967525633	23.80102779
8894.4	3.88212389	123.9528984	5.329673215	51.6274789
8899.2	3.790247525	94.08763038	4.882734952	50.58806588
8904	4.005889998	93.99183874	4.193815918	21.20618235
8908.8	3.572146272	93.94914143	4.57433996	38.3419301
8913.6	3.882978852	75.55086953	4.457493323	44.08717764
8918.4	4.03642525	58.10885468	5.648293494	18.2296842
8923.2	3.675444024	88.69408366	4.862630007	19.57320541
8928	3.918973752	91.65874724	4.109987217	51.46551569
8932.8	3.754922307	80.83955851	4.490255513	42.9119694
8937.6	4.200441502	107.8362865	5.197727023	63.64699705
8942.4	3.936434944	88.8606944	4.125132058	57.31720339
8947.2	3.576167405	75.54481839	3.940472643	45.63825928
8952	3.74055664	89.38087558	4.229156984	43.08927468
8956.8	3.505125638	77.31375369	5.05814846	40.29622721
8961.6	3.752008391	69.18397976	5.106783062	40.20240155
8966.4	4.613458335	93.69117875	5.074537723	39.5675875
8971.2	3.570698354	76.98077408	5.325467429	38.32766002
8976	3.991678564	92.44590313	5.020230329	32.71517048
8980.8	3.707636346	83.89263048	5.091879755	44.06437943
8985.6	4.059064391	99.54234383	5.500447882	56.87376213
8990.4	3.698141565	109.6459697	4.975652783	50.81833738
8995.2	3.764436657	86.57240661	3.816825797	60.50628324
9000	4.427895072	92.11211756	4.55302795	59.2845024
9004.8	3.885103101	103.5990936	4.525194687	38.92182743
9009.6	4.045009485	112.3178465	4.30623398	46.25392881
9014.4	4.390245021	97.72583342	4.422697785	40.05506807
9019.2	4.27201992	89.91935585	5.069909334	45.46035638
9024	3.930875788	93.22586529	4.588407254	57.88270869
9028.8	3.724741272	109.4099037	4.58125275	46.61918101
9033.6	4.162184296	92.3536193	4.470141122	35.61740579
9038.4	3.428757188	71.90506752	4.772483398	48.1425351
9043.2	3.464552047	89.83367615	4.388301421	56.71596639
9048	3.386008547	73.92266364	4.918427243	51.69131562
9052.8	3.728319242	115.1288554	4.672089993	49.27512384
9057.6	3.67830601	114.293072	5.746268894	30.57900541
9062.4	3.659222882	130.3692088	5.135517587	51.11290849
9067.2	3.65974982	87.39982183	5.133346289	36.77949503
9072	3.142265336	106.7210959	4.539994485	50.77034152
9076.8	3.552945293	93.87261426	4.95667403	29.04363551
9081.6	3.240658591	107.6355574	5.476419333	53.72624115
9086.4	3.630615256	90.18744752	4.899196806	48.51162217
9091.2	3.594162578	73.26458517	4.799505374	35.29628417
9096	3.402559163	106.6952625	5.390895386	20.12636071
9100.8	3.466356941	69.46895664	5.256672002	38.29822935
9105.6	3.458984467	96.49960503	4.926833606	44.54775674
9110.4	4.013909148	76.41360086	4.968120665	35.95020173
9115.2	3.847239618	72.12382135	4.353688103	30.49619503
9120	3.585359599	83.02493102	4.874311427	47.31448878
9124.8	3.428540729	73.42523322	4.552221896	56.34640298
9129.6	4.384350814	58.87208596	4.04148437	35.80049723
9134.4	3.476412403	69.84312442	4.675473378	49.08675725
9139.2	3.759700351	65.73634578	5.120792116	40.53048129
9144	3.545201779	58.22994516	5.075502585	64.70353361
9148.8	3.829390521	69.79832801	5.139901979	52.47855444
9153.6	4.291889063	73.77223198	5.00969537	39.71823654
9158.4	3.783858971	97.47156448	4.899923948	32.81135209
9163.2	3.655699621	78.76413222	5.027874495	32.72171274
9168	4.076270805	100.9878324	4.964583781	34.31570608
9172.8	3.579957793	87.07776639	4.969330052	47.72466596
9177.6	3.643455279	62.2478482	4.769388422	40.9135349
9182.4	3.054210712	96.7369	4.352002886	55.03667915
9187.2	3.555683698	92.55524053	4.962013171	32.92008519
9192	3.888221425	65.83859741	4.528550658	32.84876891
9196.8	3.835757066	88.42540402	4.753783584	38.69987058
9201.6	3.881187232	78.03110956	4.508346767	34.96653715
9206.4	3.177346589	115.7666431	4.218061467	25.95744858
9211.2	3.485225987	100.4969088	4.640915197	54.32349877
9216	2.940523597	87.44974817	4.042037614	39.45888708
9220.8	3.920711007	93.52808277	4.436462698	26.30385113
9225.6	4.167174548	60.54323942	4.401099317	29.94728556
9230.4	4.05242166	87.51499996	4.638248979	24.95953239
9235.2	3.408353915	98.24695988	4.972967202	36.85894243
9240	3.603280841	95.00482067	5.400783873	49.28055599
9244.8	3.431168552	82.09896718	5.308354887	20.14511213
9249.6	3.891810858	79.98613828	3.713830589	46.5781036
9254.4	3.469224977	90.576024	4.334586153	45.81725621
9259.2	3.573245231	71.49749693	4.997836316	42.28918446
9264	3.893788604	86.19285596	5.119073546	50.5404078
9268.8	3.333003114	81.3512231	5.225037825	33.36982083
9273.6	3.404999394	77.2532454	4.499472105	43.78565187
9278.4	3.674245071	88.76282617	4.359680943	41.30616667
9283.2	4.143072068	73.2203043	4.403549365	52.56191185
9288	3.595657557	94.35758498	4.486932484	40.06153393
9292.8	3.433047579	70.59760673	4.92698554	43.06193635
9297.6	3.302910917	70.65172042	4.839364873	52.29860057
9302.4	3.342393356	96.39867648	4.757788148	11.07612423
9307.2	3.532235824	89.9237839	4.063693385	41.52148611
9312	3.849726531	79.5698302	5.245396218	52.01929146
9316.8	4.311487074	96.87979538	4.318437983	54.41594704
9321.6	3.91596164	96.16777297	4.490572491	42.08080685
9326.4	3.182617003	96.46154593	4.498799499	39.88760887
9331.2	4.125947853	90.94353162	4.299851362	54.97596375
9336	3.608261142	96.89417415	4.807282043	44.16272293
9340.8	3.264045624	70.61753686	4.492604509	70.50619427
9345.6	3.80702625	105.3649244	4.568663184	56.51984978
9350.4	4.162558468	103.5268194	5.386460166	37.08221568
9355.2	3.134725148	128.0575347	4.768020188	30.2972598
9360	3.919537875	105.4545022	4.790147193	44.30480594
9364.8	3.533162118	90.96685871	4.408184608	36.91245789
9369.6	3.635763094	87.41682894	4.08432679	58.79542773
9374.4	3.644896769	81.81691923	4.591625317	56.76250414
9379.2	4.752195558	88.75793274	5.341008005	57.7740847
9384	4.27158942	47.76881967	4.434990644	42.82296356
9388.8	3.153041885	105.4591388	4.752094573	34.27541852
9393.6	3.548674642	82.09667698	4.55867346	51.58366345
9398.4	3.457496417	83.26857987	4.739828135	35.10284679
9403.2	3.737415853	96.92307661	4.701736356	52.12357391
9408	3.64375911	91.24755531	5.310346827	43.10753149
9412.8	3.314527336	90.31217907	5.016154143	26.08398052
9417.6	3.540831922	75.79528999	4.551526506	29.27778854
9422.4	3.630861819	110.9834901	4.663554582	29.24508108
9427.2	3.571444531	126.0324672	5.368142455	43.27782015
9432	3.062338503	101.8817532	4.626790049	33.79768184
9436.8	3.487868769	98.62556731	5.06508275	45.89387993
9441.6	3.011738891	100.283204	4.653856754	35.10372908
9446.4	3.531621735	105.6298002	5.114803731	41.93903841
9451.2	3.320319342	107.7666331	5.497001534	31.50775238
9456	3.729305157	96.08656077	4.910991802	42.39164692
9460.8	3.468787028	87.95698473	4.84313328	35.63812259
9465.6	3.15084739	95.360918	4.708492635	39.05820333
9470.4	3.544839337	104.2883921	5.545727089	56.0428672
9475.2	3.306637977	80.74146615	5.107874828	49.74898998
9480	3.464438623	93.10285729	4.803382764	61.47049312
9484.8	3.942845535	94.90499359	5.270461076	52.02878139
9489.6	3.529469463	83.93613848	5.373318276	44.92860072
9494.4	3.607671047	80.48618127	4.921205853	37.76996925
9499.2	3.538436386	109.6799992	4.825466158	39.31650301
9504	4.206853929	52.38326894	5.262950241	63.36550815
9508.8	3.324485752	87.0981213	5.508165187	30.38471814
9513.6	3.526000519	76.67998495	4.980397902	46.55183185
9518.4	3.902277879	84.86903571	4.308448322	38.58874277
9523.2	3.417568714	85.14885094	5.026314319	37.11341608
9528	3.736349444	93.30504691	5.034102484	43.66767981
9532.8	3.783364235	77.02137663	4.925783891	45.75409516
9537.6	3.724684477	102.1335463	4.639265016	45.33086212
9542.4	3.568237521	97.28118699	4.73377601	52.40554409
9547.2	3.380844474	68.26475626	5.317068441	35.45277804
9552	3.850241134	91.53416485	5.114923618	42.20709331
9556.8	3.561721231	91.141307	4.719745314	43.81259742
9561.6	4.102254224	87.18203775	4.87253833	41.62199752
9566.4	3.818339238	77.06715519	4.445060106	13.59989831
9571.2	3.269671448	90.22453559	5.366918904	43.10250531
9576	3.618254385	88.08385006	4.70673197	48.90762151
9580.8	3.435306923	93.73117728	5.133338068	31.8547179
9585.6	4.291917529	64.94740952	5.098634566	51.99204578
[truncated: 18,838 more rows]
